1 **Electron Microscopic Reconstruction of Neural Circuitry in the Cochlea**

2 Yunfeng Hua<sup>1-5\*</sup>, Xu Ding<sup>2-3\*</sup>, Haoyu Wang<sup>4\*</sup>, Fangfang Wang<sup>4\*</sup>, Yunge Gao<sup>2,3</sup>, Yan Lu<sup>4</sup>, Tobias  
3 Moser<sup>6-8#</sup>, Hao Wu<sup>1-4#</sup>

4

5 <sup>1</sup>Department of Otolaryngology-Head and Neck Surgery, Shanghai Ninth People's Hospital, China

6 <sup>2</sup>Ear Institute, Shanghai Jiao Tong University School of Medicine, China

7 <sup>3</sup>Shanghai Key Laboratory of Translational Medicine on Ear and Nose Diseases, China

8 <sup>4</sup>Shanghai Institute of Precision Medicine, Shanghai Ninth People's Hospital, China

9 <sup>5</sup>Department of Connectomics, Max-Planck-Institute for Brain Research, Germany

10 <sup>6</sup>Institute for Auditory Neuroscience, University Medical Center Göttingen, Germany

11 <sup>7</sup>Auditory Neuroscience Group, Max Planck Institute of Experimental Medicine, Germany

12 <sup>8</sup>Multiscale Bioimaging Cluster of Excellence (MBExC), University of Göttingen, Germany

13

14 \*These authors contributed equally to this work.

15 #Correspondence: [haowu@sh-jei.org](mailto:haowu@sh-jei.org) (H.W.), [tmoser@gwdg.de](mailto:tmoser@gwdg.de) (T.M.)

16

17

18 **Abstract**

19 Recent studies have revealed great diversity in the structure, function and efferent innervation of  
20 afferent synaptic connections between the cochlear inner hair cells (IHCs) and spiral ganglion  
21 neurons (SGNs), which likely enables audition to process a wide range of sound pressures. By  
22 performing an extensive electron microscopic reconstruction of the neural circuitry in the mature  
23 mouse organ of Corti, we demonstrate that afferent SGN-dendrites differ in strength and  
24 composition of efferent innervation in a manner dependent on their afferent synaptic connectivity  
25 with IHCs. SGNs that sample glutamate release from several presynaptic ribbons receive more  
26 efferent innervation from lateral olivocochlear projections than those driven by a single ribbon. Next  
27 to the prevailing unbranched SGN-dendrites, we found branched SGN-dendrites that can contact  
28 several ribbons of 1-2 IHCs. Unexpectedly, medial olivocochlear neurons provide efferent  
29 innervation of SGN-dendrites, preferring those contacting single-ribbon, pillar-side synapses. We  
30 propose a fine-tuning of afferent and efferent SGN-innervation.

31

## 32 **Introduction**

33 Acoustic information is encoded into neural signals in the cochlea, the mammalian hearing organ in  
34 the inner ear. Sound encoding by afferent spiral ganglion neurons (SGNs) faithfully preserves signal  
35 features such as frequency, intensity, and timing (for reviews see ref. [1-3](#)). It also is tightly  
36 modulated by efferent projections of the central nervous system to enable selective attention and to  
37 aid signal detection in noisy background, sound source localization as well as ear protection against  
38 acoustic trauma (see reviews [4,5](#)). Sound encoding occurs at the afferent connections between inner  
39 hair cells (IHCs) and postsynaptic type-1 SGNs (<sup>1</sup>SGNs) that constitute 95% of all SGNs [6,7](#). These  
40 so-called ribbon synapses exhibit glutamate-mediated neurotransmission at rates of hundreds per  
41 second and with sub-millisecond precision [1,8](#).

42 In the mouse cochlea, each IHC is contacted by 10-30 <sup>1</sup>SGNs and it is thought that each IHC  
43 active zone drives firing in a single unbranched peripheral SGN-neurite (also referred to as SGN-  
44 dendrite). These afferent connections exhibit great diversity in synaptic and <sup>1</sup>SGN dendritic  
45 morphology [9-15](#), physiological properties [9,12,14,16](#), and molecular <sup>1</sup>SGN profile [17-19](#). Across different  
46 animal species, <sup>1</sup>SGN can be classified into three functional subtypes, namely low, medium, and  
47 high spontaneous rate (SR) <sup>1</sup>SGNs that also differ in the thresholds and dynamic range of sound  
48 encoding [7,16,20-22](#). In the cat [6](#), classical back-tracing experiments linked function to morphology  
49 showing that low SR <sup>1</sup>SGNs have thinner dendrites with fewer mitochondria than high SR <sup>1</sup>SGNs.  
50 Low SR <sup>1</sup>SGNs preferentially innervate the modiolar (neural) side of the IHC, where they face larger  
51 and more complex presynaptic active zones (AZs) [6,23-25](#). Larger and more complex AZs at the  
52 modiolar side of IHCs were also found in mouse [11-13](#), guinea pig [26,27](#), and gerbil [28](#), suggesting that  
53 some morphological corollaries of functional <sup>1</sup>SGN diversity may be shared across species.

54 Modiolar AZs, in general, contain larger and/or multiple ribbons as well as more membrane-  
55 proximal SVs<sup>13,23</sup> and Ca<sup>2+</sup> channels that need stronger depolarization for activation than at the pillar  
56 (abneural) face<sup>12</sup>. What might appear as a peculiar biological variance at first glance, is becoming  
57 increasingly recognized as a fascinating parallel information processing mechanism by which the  
58 auditory system copes with encoding over a broad range of sound pressures downstream of cochlear  
59 micromechanics. Specifically, emerging evidence indicates that the full sound intensity information  
60 contained in the IHC receptor potential is fractionated into subpopulations of <sup>1</sup>SGNs that  
61 collectively encode the entire audible range of <sup>1</sup>SGNs (recent reviews in ref. [1,29,30](#)). Besides,  
62 afferent cochlear signaling is dynamically modulated by efferent projections emanating from the  
63 medial and lateral superior olivary complex of the auditory brainstem<sup>31</sup>. The efferent projections of  
64 the medial olivocochlear component (MOC) form cholinergic synapses onto outer hair cells (OHCs)  
65 and suppress their electromotility, thereby attenuating cochlear amplification<sup>32-34</sup>. The lateral  
66 olivocochlear component (LOC) directly modulates <sup>1</sup>SGNs via axodendritic synapses near the  
67 afferent ribbon synapses (for reviews see ref. [5,35](#)). Efferent innervation seems more pronounced  
68 for <sup>1</sup>SGNs contacting IHCs at the modiolar face and de-efferentation interferes with the modiolar-  
69 pillar gradient of ribbon size<sup>36</sup>. In rodents, the LOC fibers express a variety of neurotransmitters  
70 including dopamine (DA), acetylcholine (ACh) and  $\gamma$ -amino-butyric acid (GABA) among others  
71 (for reviews see ref. [37,38](#)). LOC control of <sup>1</sup>SGNs is thought to serve interaural matching<sup>39,40</sup> as  
72 well as <sup>1</sup>SGN gain control<sup>41</sup>.

73 Despite major efforts on structural investigation of cochlear afferent and efferent innervation  
74 using light microscopy<sup>42-45</sup> and electron microscopy (EM)<sup>15,23,24,46-53</sup>, a comprehensive diagram of  
75 the neural circuitry in the organ of Corti remains to be established. Here we report the complete

76 reconstruction of two large EM volumes acquired from the organ of Corti of the mid-frequency  
77 cochlear region of mature CBA mice. We employed serial block-face EM (SBEM) imaging<sup>54</sup> which  
78 offered the spatial resolution required for both comprehensive connectomic analysis and structural  
79 studies of afferent and efferent synapses. This revealed a substantial fraction of <sup>1</sup>SGNs (12 %) with  
80 terminal bifurcation, which results in input of two or more AZs from one or two IHCs. Unexpectedly,  
81 we found robust MOC innervation of <sup>1</sup>SGN dendrites preferentially on the pillar IHC side. Efferent  
82 innervation, primarily by LOCs, was stronger for <sup>1</sup>SGN dendrites receiving input from multiple  
83 ribbons.  
84

85 **Results**

86 To perform a comprehensive structural analysis of the mammalian cochlear circuit, we first acquired  
87 a SBEM dataset from the left cochlea of a 7-week-old wildtype female mouse (**Fig. 1 a & b**). We  
88 employed CBA mice that are considered as the gold standard for analyzing normal mouse hearing  
89 as they, in contrast to C57BL/6 mice, do not show rapid age-related hearing loss<sup>55</sup>. The field of  
90 scanning was centered on the organ of Corti of the cochlear mid-turn and encompassed 15 IHCs and  
91 45 OHCs. 2500 consecutive image slices were collected, resulting in a 3D-aligned volume of (xyz)  
92  $262 \times 194 \times 100 \mu\text{m}^3$  at  $11 \times 11 \times 40 \text{ nm}^3$  voxel size (**Suppl. video 1 & 2**). Dense reconstruction of  
93 the inner spiral bundle (ISB) beneath the 15 IHCs (**Fig. 1 c**) was done by manual annotation using  
94 an open-source visualization and annotation software called webKNOSSOS<sup>56</sup>. Despite 40 nm  
95 cutting thickness, quantification using a redundant-skeleton consensus procedure (RESCOP)<sup>57</sup>  
96 suggests a tracing quality comparable to the published SBEM cortex datasets of 30 nm cutting  
97 thickness (**Suppl. Figure 1**). Tracing revealed a total of 234 <sup>1</sup>SGN-dendrites, 32 LOC as well as 39  
98 MOC fibers, which contribute 47.2 %, 36.5 %, and 13.0 % to a total circuit path length of 16.97 mm  
99 in the ISB region (**Fig. 1 d & e**). SGN-dendrites were identified as fibers contacting ribbon-type  
100 AZs of IHCs (dendrites emanating from <sup>1</sup>SGNs) or OHCs (dendrites emanating from <sup>2</sup>SGNs  
101 crossing the tunnel of Corti). Efferent fibers were defined as LOCs if they exclusively synapsed  
102 onto <sup>1</sup>SGNs and IHCs (not further analyzed in this study) and as MOCs if they crossed the tunnel  
103 of Corti and also contacted the OHCs. All MOCs were thick compared to LOCs and <sup>2</sup>SGNs and  
104 formed presynaptic terminals onto OHCs. A total of 1517 efferent synapses onto <sup>1</sup>SGNs were  
105 annotated in the dataset. A second dataset (26 IHCs, 366 <sup>1</sup>SGN-dendrites, **Fig. 1 f & g**) was acquired  
106 from an 8-week-old female mouse and analyzed after completing the analysis of the first EM volume.

107 **Ribbon synapse heterogeneity in IHCs.** Volume EM techniques have been recently employed to  
108 investigate ribbon synapse morphology in the apical cochlea of C57BL/6 mice at different  
109 developmental stages<sup>13</sup>. Our SBEM datasets now provide detailed structural insight into the mature,  
110 most sound sensitive, mid-cochlear region of the organ of Corti<sup>10,16,42</sup>. The high spatial resolution  
111 and large volume of the dataset allowed for precise structural quantification of ribbons as well as  
112 the postsynaptic <sup>1</sup>SGN-dendrites (**Fig. 2 a & b**). From 15 reconstructed IHCs, a total of 308 ribbons  
113 were identified and volume traced by human annotators. Ribbon positions within IHCs were  
114 determined in the plane perpendicular to the IHC habenular-cuticular axis (same as described in ref.  
115 <sup>36</sup>). The ribbon volume tended to be smaller in the 26 IHCs of the 2<sup>nd</sup> animal which did not reach  
116 significance for the mean ribbon volume ( $0.0136 \pm 0.0056$ ,  $n = 308$  for the 1<sup>st</sup> animal vs.  $0.0128 \pm$   
117  $0.0069$ ,  $n = 468$  for the 2<sup>nd</sup> animal,  $p = 0.0932$ ) but was significant for the ribbons on the pillar IHC  
118 side (**Fig. 2 c**,  $0.0117 \pm 0.0049 \mu\text{m}^3$ ,  $n = 142$  vs.  $0.0098 \pm 0.0043$ ,  $n = 192$ ,  $p = 0.0183$ ). We consider  
119 this to represent biological variance as technical reasons are unlikely (no indication for shrinkage  
120 based on other structures such as mitochondria or axon calibers for the 2<sup>nd</sup> animal, data not shown).

121 In agreement with previous quantifications using light microscopy<sup>11,12</sup>, a prominent modiolar-  
122 pillar size gradient of ribbon sizes was observed in both animals (**Fig. 2 c**). On average, ribbons  
123 designated to the modiolar side of the IHCs were 40 % larger than those at the pillar side (in the 1<sup>st</sup>  
124 animal,  $0.0153 \pm 0.0055$  vs.  $0.0117 \pm 0.0049 \mu\text{m}^3$ ,  $p < 0.0001$ ; in the 2<sup>nd</sup> animal,  $0.0147 \pm 0.0074$   
125 vs.  $0.0098 \pm 0.0043 \mu\text{m}^3$ ,  $p < 0.0001$ ). In addition to the heterogeneity of ribbon size within IHCs,  
126 we found differences in the distributions of ribbon abundance and size between IHCs, even in  
127 neighbors (**Fig. 2 d & e**), which have not yet been reported to our knowledge. In some extreme  
128 cases, individual IHCs can exclusively contain large or small ribbons, which we, different from<sup>36</sup>,

129 found to be unrelated to the characteristic staggering arrangement of IHCs in the cochlear mid-turn.

130 The amount of cellular ribbon material might be conserved as the mean size of ribbons in an IHC

131 negatively correlates with its total number of ribbons (**Fig. 2 e**).

132

133 **Quantification of afferent and efferent inputs on <sup>1</sup>SGN-dendrites.** Besides receiving

134 glutamatergic input from ribbon-type AZs of IHCs, <sup>1</sup>SGN-dendrites are the primary postsynaptic

135 target of efferent LOC projections. A prior study of the effects of lesioning the LOC projections

136 indicated that innervation by LOCs is required for maintaining the modiolar-pillar ribbon size

137 gradient<sup>36</sup>. Here, we mapped the efferent innervation on <sup>1</sup>SGN-dendrites to relate it to the position

138 of afferent <sup>1</sup>SGN-boutons on IHCs and to the morphology of the corresponding IHC AZ.

139 Reconstruction of <sup>1</sup>SGN-dendrites together with their complete afferent and efferent inputs in the

140 ISB region revealed several unexpected findings. First, we found that three morphologically distinct

141 subpopulations of <sup>1</sup>SGNs coexist in the mature cochlea (**Fig. 3 a**). Out of in total 234 <sup>1</sup>SGNs in the

142 1<sup>st</sup> animal, 170 (72.6 %) were identified as unbranched <sup>1</sup>SGNs receiving input from an IHC AZs

143 holding a single ribbon (“single-ribbon variant”, **Fig. 3 a1**), 35 (15.0 %) as unbranched <sup>1</sup>SGNs but

144 input from multiple ribbons (“unbranched multi-ribbon”), and strikingly 29 (12.4 %) as branched

145 or bifurcated <sup>1</sup>SGN-dendrites with input from multiple ribbons of one or two IHCs (“branched

146 multi-ribbon”, **Fig. 3 a2 & a3** and **Suppl. Figure 2**). Analysis performed in the 2<sup>nd</sup> animal

147 corroborated these results: this and further classification of <sup>1</sup>SGN-dendrites of both animals are

148 summarized in **Table 1**. Branched <sup>1</sup>SGN-dendrites more commonly connected to AZs of

149 neighboring IHCs (24 out of 29 of the 1<sup>st</sup> sample and 42 out of 46 of the 2<sup>nd</sup> sample) instead of to

150 AZs of a single IHC. Branched <sup>1</sup>SGNs preferentially contacted the modiolar face of the IHCs: 29



151 out of 29 (1<sup>st</sup> sample) and 45 out of 46 (2<sup>nd</sup> sample) contacted at least one modiolar AZ. Exclusive  
152 input from modiolar AZs was found for 13 out of 29 (1<sup>st</sup> sample) and 23 out of 46 branched (2<sup>nd</sup>  
153 sample) <sup>1</sup>SGNs. As previously reported for the apex of the mouse cochlea<sup>13</sup>, AZs with multiple  
154 ribbons preferred the modiolar IHC side (20 out of 35, 1<sup>st</sup> sample and 38 out of 48, 2<sup>nd</sup> sample) also  
155 in our mid-cochlear datasets.

156 Analysis of the efferent innervation of the unmyelinated segments of <sup>1</sup>SGN-dendrites revealed  
157 a varying number of efferent synapses ranging from 0 up to 20 (**Fig. 3 b**). Significantly more efferent  
158 contacts are formed on unbranched and branched multi-ribbon <sup>1</sup>SGNs than on unbranched, single-  
159 ribbon <sup>1</sup>SGNs (**Fig. 3 c**,  $8.82 \pm 3.70$  for multi-ribbon <sup>1</sup>SGNs vs.  $5.70 \pm 2.53$  for single-ribbon <sup>1</sup>SGNs,  
160  $p < 0.001$ ). For unbranched, single-ribbon <sup>1</sup>SGNs a stronger efferent innervation was observed for  
161 modiolar <sup>1</sup>SGNs than for pillar <sup>1</sup>SGNs ( $6.37 \pm 2.95$  for the modiolar <sup>1</sup>SGNs vs.  $5.26 \pm 2.20$  for the  
162 pillar <sup>1</sup>SGNs, **Fig. 3 c inset**,  $p = 0.0073$ ). Considering that AZs with large and multiple ribbons,  
163 which likely provide greater maximum rates of transmitter release, are more prevalent on the IHC  
164 modiolar side, our data indicates the strength of efferent modulation of <sup>1</sup>SGNs correlates with  
165 stronger afferent input. We controlled this result by mapping all efferent innervation on randomly  
166 selected single- and multi-ribbon <sup>1</sup>SGN-dendrites in the 2<sup>nd</sup> animal (**Fig. 3 d**). Again, we found more  
167 efferent synapses formed on multi-ribbon <sup>1</sup>SGN-dendrites than on those of single-ribbon ones ( $7.70$   
168  $\pm 2.29$  vs.  $4.43 \pm 2.16$ , **Fig. 3 e**). Note that the increased efferent innervation was achieved by more  
169 efferent synapses along the <sup>1</sup>SGN-dendrites in the ISB region rather than in the direct vicinity of  
170 ribbon synapse (**Suppl. Figure 3**).

171

172 **<sup>1</sup>SGNs are innervated by efferent terminals of both LOC and MOC fibers.** We note that the

173 above analysis of efferent innervation did not distinguish synapses formed by LOC and MOC fibers.  
174 Due to the extent of the reconstruction, it was possible to distinguish MOC fibers from LOC fibers  
175 (**Fig. 4 a to c**), unambiguously by their characteristic crossing of the tunnel of Corti (**Fig. 4 d**) and  
176 OHC innervation (**Fig. 4 e**), while LOC fibers remain exclusively in the ISB region. Unexpectedly,  
177 we found that <sup>1</sup>SGNs were also frequently contacted by MOC fibers, which showed parallel calibers  
178 of varying length with much less branching in the ISB before turning to cross the tunnel (**Fig. 4 d**  
179 **to f**). Compared to LOC synapses (**Fig. 4 c**), MOC terminals on <sup>1</sup>SGN-dendrites showed larger  
180 bouton size but sparser vesicle content (**Fig. 4 f**). Extended structural quantification of all 39 MOC  
181 and 32 LOC fibers revealed that MOC fibers form fewer efferent synapses in the ISB region (**Fig.**  
182 **4 g**) and preferentially innervate <sup>1</sup>SGN-dendrites contacting the pillar IHC side (**Fig. 4 h**). This is  
183 consistent with the observation that MOC-innervated <sup>1</sup>SGNs have small ribbon size (**Fig. 4 i**) and  
184 receive weaker efferent innervation (**Fig. 4 j**). In conclusion, this data suggests a hitherto unreported  
185 function of MOC fibers in modulating <sup>1</sup>SGNs, particularly those contacting the IHC pillar side.  
186 Together with the preference of LOC fibers to innervate modiolar <sup>1</sup>SGNs, the data indicates a  
187 differential modulation of <sup>1</sup>SGNs by projections from medial and lateral subdivisions of the superior  
188 olivary complex.

189

190 **Spatial organization of efferent innervation on <sup>1</sup>SGNs.** As described above, both LOC and MOC  
191 innervation coexists on individual <sup>1</sup>SGN-dendrites and their presynaptic terminals have distinct  
192 appearances (**Fig. 4 c & f**). By these criteria, we identified 1175 putative LOC and 342 putative  
193 MOC terminals out of the total of 1517 efferent contacts on <sup>1</sup>SGN-dendrites. Consistent with the  
194 relative innervation specificity of LOC and MOC projections reported above, the dendrite-based

195 analysis of efferent input indicates that both modiolar <sup>1</sup>SGNs, and multi-ribbon <sup>1</sup>SGNs in particular,  
196 receive strong LOC innervations (**Fig. 5 a**) but weak MOC innervations (**Fig. 5 b**). In fact, MOC  
197 synapses skip more than half of modiolar and multi-ribbon <sup>1</sup>SGNs (**Fig. 4 h**) and preferentially  
198 contact the pillar <sup>1</sup>SGNs that in return featured only few LOC synapses. In conclusion, the efferent  
199 innervation showed a <sup>1</sup>SGN-subdivision-specific dichotomy: LOC preferentially synapse on  
200 modiolar and multi-ribbon <sup>1</sup>SGNs and MOC predominantly on pillar <sup>1</sup>SGNs (**Fig. 5 c**).

201 Finally, we found a segregation of MOC and LOC innervation sites on <sup>1</sup>SGN-dendrites with  
202 LOC terminals being more proximal to the ribbon synapses and MOC terminals synapsing more  
203 distally, towards the heminode (**Fig. 5 d inset**). We further measured the afferent dendritic  
204 pathlength and concluded that distinct innervation sites of LOC and MOC synapses were not a  
205 consequence of variability in their path length within the ISB (**Fig. 5 d**). A similar result was  
206 obtained from the same quantification on randomly selected <sup>1</sup>SGNs in the 2<sup>nd</sup> animal (**Suppl. Figure**  
207 **4**). The spatial distribution of efferent terminals (**Fig. 5 e**) as well as the efferent fiber trajectories  
208 (**Fig. 5 f**) show a spatial segregation of the MOC and LOC projections within the ISB, which might  
209 instruct their preferred <sup>1</sup>SGN innervation.  
210

211 **Discussion**

212 In the last decade, high throughput volume EM techniques have rendered dense reconstruction of  
213 large-scale mammalian neural circuits realistic within reasonable time and costs<sup>58,59</sup>. SBEM and  
214 FIB-SEM offer several advantages over other volume EM techniques based on thin slice manual  
215 collection, including less image distortion and slice loss, as well as fully automated acquisition  
216 cycle<sup>59,60</sup>. Despite lower z-resolution, in the end we chose SBEM instead of FIB-SEM in order to  
217 cover a larger volume for a more comprehensive circuit level analysis in the organ of Corti.  
218 Additional iterations of system optimization were made to overcome technical issues like charging  
219 artefacts and limited cutting thickness. Finally, by combining optimized sample preparation to  
220 increase tissue conductivity, implementing focal charge compensation to minimize charging from  
221 pure resin areas, and cutting along the direction of efferent calibers to improve the traceability at 40  
222 nm z-resolution, we managed to acquire a dataset that allowed dense circuit reconstruction in the  
223 mature cochlea. The volume EM analysis of this study reveals an unprecedented complexity of the  
224 neural circuitry of the organ of Corti, rigorously tests established concepts on cochlear circuitry, and  
225 provides novel observations that allowed us to generate new hypotheses to be tested in the future.  
226 Novel findings regarding afferent and efferent innervation include a substantial fraction of branched  
227 SGN-dendrites and a differential efferent innervation of modiolar and pillar SGN-dendrites by LOC  
228 and MOC projections. Hence, afferent information mixing occurs and potentially improves the  
229 signal-to-noise relation of coding in a subset of <sup>1</sup>SGNs. Efferent control of <sup>1</sup>SGN-dendrites  
230 contacting the modiolar and pillar faces of the IHCs seems to involve fine-tuned innervation by  
231 MOC and LOC and likely contributes to diversifying <sup>1</sup>SGN response properties for wide dynamic  
232 range sound encoding.

233

234 **Afferent connectivity of <sup>1</sup>SGNs: graded synaptic strength and postsynaptic information**

235 **mixing**

236 The prevailing view on the afferent connectivity of <sup>1</sup>SGNs in the mature mammalian cochlea is the

237 mono-synaptic contact of an unbranched <sup>1</sup>SGN-dendrite with a single-ribbon IHC AZ.

238 Reconstructing a large volume of the mouse organ of Corti, we reveal a considerable fraction of

239 branched <sup>1</sup>SGN-dendrites (12 %). The bifurcation of the <sup>1</sup>SGN-dendrite enables multiple synaptic

240 contacts with one or, more frequently, two neighboring IHC(s) (**Fig. 3 a** and **Suppl. Figure 2**).

241 Substantial branching of <sup>1</sup>SGN-dendrites was reported for the human cochlea<sup>51</sup>, while its prevalence

242 in other species such as guinea pig<sup>49,61</sup> and cat<sup>24,62</sup> remains less clear. We do not consider this to

243 reflect a pathology as the number of afferent synapses per IHC (17.5 afferent synapses) agrees

244 closely with other estimates for the mid-cochlear mouse organ of Corti obtained by

245 immunofluorescence or electron microscopy<sup>10,63,64</sup>. The observation of branched, multi-ribbon

246 <sup>1</sup>SGNs adds further complexity to the afferent SGN connectivity: with regard to presynaptic IHCs,

247 site of contact as well as ribbon morphology. It is tempting to speculate that such information mixing

248 on the level of SGNs might improve the signal-to-noise ratio of sound coding. Peripheral branching

249 of afferent auditory neurons is commonly found in the hearing organs of birds and lower

250 vertebrates<sup>65,66</sup>.

251 So far, the presence of multiple ribbons at a single AZ was considered the exception to the rule

252 and, if encountered, to occur at modiolar AZs<sup>13,23,25,67</sup>. Note that the multi-ribbon synapses described

253 here and in other studies differ from complex synapses found in cat, which were defined as having

254 an extended AZ with a single ribbon<sup>24</sup>. Here, we found that about 14 % afferent synapses contain

255 more than one ribbon and together with another 12 % branched <sup>1</sup>SGN with multiple afferent contacts  
256 constitute a considerable fraction (more than 1/4) of <sup>1</sup>SGNs with enhanced excitation in the middle  
257 turn of the mouse cochlea (**Fig. 3 a**). In addition, we demonstrate the modiolar-pillar size gradient  
258 of ribbon size and abundance for IHC AZs at the level of electron microscopy for a large sample of  
259 308 synapses (**Fig. 2 c**). This corroborates previous light microscopy<sup>11,12</sup> and electron microscopy<sup>23-</sup>  
260 <sup>25,67</sup> studies. Together with the notion of the preference of low spontaneous rate, high threshold  
261 <sup>1</sup>SGNs for modiolar AZs, this begs the questions how presynaptic strength can relate to weaker  
262 sound responses. One candidate mechanism to explain this apparent conundrum is the more  
263 depolarized activation range of the Ca<sup>2+</sup> influx at the modiolar AZs<sup>12</sup>. Our present study suggests  
264 that stronger efferent modulation of <sup>1</sup>SGNs facing multi-ribbon AZs also contributes to <sup>1</sup>SGN  
265 diversity (see next section).

266 As previously described for the mid-turn of the mouse cochlea by immunofluorescence  
267 microscopy<sup>36</sup>, we found the IHCs to be arranged in a partially staggered fashion. However, the  
268 influence of the staggered IHC arrangement on ribbon size seems minor if present at all (**Fig. 2**):  
269 IHCs closer to the pillar side tended to have smaller ribbons on average than those closer to the  
270 modiulus, which however did not reach significance. Interestingly, the notable negative correlation  
271 between the size and abundance of ribbons in IHCs (**Fig. 2 e**) suggests an endogenous control of  
272 total supply of ribbon material.

273

#### 274 **Tuning the strength of afferent and efferent inputs into <sup>1</sup>SGNs**

275 A key result of the present study is the observation that the likely stronger maximal afferent input  
276 by multi-ribbon AZs and/or multiple synapses into SGNs is accompanied by stronger efferent

277 innervation (**Fig. 3 c & e**). This contrasts findings in cat, where a modiolar-pillar gradient of efferent  
278 inputs on <sup>1</sup>SGN-dendrites primarily resulted from efferent innervation of SGNs forming complex  
279 synapses at the IHCs' modiolar face<sup>24,25</sup>. We postulate that the maximal synaptic strength of afferent  
280 transmission might co-determine the extent of efferent innervation by LOC projections. Previous  
281 studies showed a shifted acoustic sensitivity of <sup>1</sup>SGNs to higher sound pressure levels during  
282 efferent activation<sup>68,69</sup>, resetting the dynamic range. We speculate that matching the strengths of  
283 afferent (ribbon) and efferent (LOC) transmission to modiolar <sup>1</sup>SGNs may allow a tuning of sound  
284 encoding to fit the range of sound pressure “on demand”. Surgical de-efferentation of the mature  
285 mouse cochlea was shown to attenuate the modiolar-pillar gradient of ribbon size, suggesting a key  
286 role for the efferent system in maintaining functional heterogeneity of the afferent synapses<sup>36</sup>. Hence,  
287 efferent innervation might contribute to shaping neural response diversity underlying wide dynamic  
288 range coding by modulating <sup>1</sup>SGNs as well as by instructing the synaptic properties in a position-  
289 dependent manner.

290 To our knowledge, this comprehensive EM circuit analysis of a large cochlear volume for the  
291 first time found MOC fibers to make considerable amounts of synaptic contacts with <sup>1</sup>SGN-  
292 dendrites before leaving the ISB region towards OHCs (**Fig. 4 d**). Efferent <sup>1</sup>SGN innervation seems  
293 to be a general feature of MOC innervation, because this kind of connections was found in 37 out  
294 of 39 annotated MOC fibers (**Fig. 4 g**), indicating a novel function of MOC modulation in <sup>1</sup>SGN  
295 activities beyond its well-identified suppressive effect on OHC motility<sup>32-34</sup>. Previous EM studies,  
296 to our knowledge, did not report synapses onto <sup>1</sup>SGN-dendrites in the ISB of tunnel-crossing MOC  
297 fibers, possibly because the reconstructed datasets were limited to 2-3 IHCs<sup>13,24,25,51,53</sup>. Moreover,  
298 as MOC fibers form *en passant* synapses instead of branched nerve endings with <sup>1</sup>SGN-dendrites

299 (Fig. 4 d), they likely escaped detection in single-fiber tracing experiments using light  
300 microscopy<sup>52,70</sup>. Nevertheless, *en passant* bouton structures within the ISB can be appreciated in  
301 traced single MOC calibers<sup>44</sup>.

302 It remains to be studied whether MOC fibers employ acetylcholine as the only neurotransmitter  
303 in terminals on both <sup>1</sup>SGN-dendrites and OHCs. If that was the case, based on the observation of an  
304 acetylcholine injection experiment<sup>71</sup> one might expect an elevation of spontaneous firing in <sup>1</sup>SGNs  
305 in addition to the classic MOC-mediated suppression of cochlear amplification. This way, MOC  
306 modulation might contribute to the high spontaneous firing rate of <sup>1</sup>SGNs contacting the pillar IHC  
307 side (Fig. 5 b). MOC terminals tend to innervate SGNs closer to the heminode (Fig. 5 d), which  
308 may overlap with the proposed innervation site of putative inhibitory dopaminergic LOC fibers<sup>72</sup>.  
309 This notion seems supported by the observation in a LOC-lesion experiment that a narrow band of  
310 acetylcholine positive puncta colocalized partially with sparse dopamine positive puncta<sup>45</sup>. However,  
311 at least for the basal high frequency cochlea, such colocalization might alternatively reflect  
312 terminals of intrinsic cholinergic LOC neurons co-releasing dopamine<sup>73</sup>.

313 This study presents a comprehensive circuit diagram with quantification that enriches our  
314 insight into the structure underlying auditory signal processing. Besides novel insight into normal  
315 cochlear structure, the result of circuit analysis serves as a baseline for future structural  
316 investigations, including noise-induced synaptopathy<sup>74</sup>, aging-related structural alteration<sup>75-77</sup> and  
317 putative tinnitus-related synaptic plasticity changes<sup>78</sup>.

318

### 319 Acknowledgements

320 We thank Dr. M. Lei (SHIPM) for discussion and comments on the manuscript; Dr. M. Helmstaedter



321 (MPI-BR) for support in the initial phase of the project; Drs. R. Redman, P. Bastians from Zeiss  
322 (APAC) for technical advice; Dr. J. Neef for comments on the manuscript; D. Li, J. Pan, J. Lu, H.  
323 Liu, B. Feng, Z. Jiang, C. Jin, L. Zhou, X. Yu, W. Wang, G. Li and Z. Chen for the tracing work.  
324 This study was supported by The Program for Professor of Special Appointment (Eastern Scholar)  
325 at Shanghai Institutions of Higher Learning (QD2018015 to Y.H.), the National Natural Science  
326 Foundation of China (81800901 to Y.H. and 81730028 to H.W.), the National Basic Research  
327 Development Program of China (SQ2017YFSF080012 to H.W.) and Shanghai Key Laboratory of  
328 Translational Medicine on Ear and Nose Diseases (14DZ2260300), Joint Research Initiative  
329 Shanghai Jiao Tong University School of Medicine (to Y.H. and T.M.). Work by T.M. was supported  
330 by the Deutsche Forschungsgemeinschaft (DFG, German Research Foundation) under  
331 Germany's Excellence Strategy - EXC 2067/1- 390729940 to T.M. as well as by the DFG's  
332 Leibniz Program to T.M.

333

#### 334 **Declarations of interest**

335 The authors have declared that no conflicts of interest exist.

336

#### 337 **Author contributions**

338 Y.H., H.W. and T.M. designed and supervised the study. Y.H., X.D. and F.W. performed the SBEM  
339 experiment. Y.H. and H.H.W. analyzed the data. X.D., Y.G., Y.L. assisted with the data analysis. Y.H.  
340 and T.M. wrote the manuscript with the help of the other authors.

341

#### 342 **Figure legends**

343 **Figure 1. SBEM imaging and dense reconstruction of the mouse organ of Corti. (a)** Left:  
344 location of the SBEM dataset (green box) in the resin-embedded cochlea. Right: dimension of the  
345 dataset. Red box: virtual cross-section at the position as indicated in (left). **(b)** High-resolution  
346 example image of neurites beneath IHCs and a representative <sup>1</sup>SGN bouton was indicated by  
347 asterisk (green). Scale bar 2  $\mu$ m. **(c)** Reconstruction of all 322 neurites in the dataset. Left: skeletons  
348 of all radial <sup>1</sup>SGN-dendrites (green) and one representative <sup>2</sup>SGN-dendrite with a characteristic turn  
349 towards the cochlear base (grey). Right: skeletons of all LOC fibers (blue) and MOC fibers (magenta)  
350 with main trunks extending into habenula perforatae and, for MOC, tunnel-crossing fibers towards  
351 the OHC region. Small grey spheres represent OHCs and large dark spheres represent IHCs. Scale  
352 bar 20  $\mu$ m. **(d, e)** Quantification of circuit components. All 234 <sup>1</sup>SGN-dendrites (green), 32 LOC  
353 fibers (blue) and 39 MOC fibers (magenta) contribute 47.2 % (8.01 mm), 36.46 % (6.19 mm) and  
354 13.05 % (2.21 mm) of circuit path length (total: 16.97 mm) in the ISB region, respectively. Others  
355 include e.g. <sup>2</sup>SGN-dendrites. **(f)** Snapshot of the second SBEM dataset. **(g)** Reconstruction of all  
356 366 <sup>1</sup>SGN-dendrites (green), all 468 ribbons (red) and 26 IHC nuclei (grey) of the second SBEM  
357 dataset. Scale bar 20  $\mu$ m.  
358

359 **Figure 2 Quantification of synaptic ribbons in the IHCs. (a)** Consecutive slices showing a  
360 representative ribbon synapse (red box) and the postsynaptic <sup>1</sup>SGN bouton (green) co-innervated by  
361 an efferent terminal (blue). Scale bar 1  $\mu\text{m}$ . **(b)** Volume reconstruction of an exemplary IHC with  
362 all ribbon synapses (red) and <sup>1</sup>SGNs (green), and a representative LOC fiber (blue). Scale bar 5  $\mu\text{m}$ .  
363 IHC location as indicated in Suppl. Figure 1. **(c)** Boxplot of measured ribbon sizes. All identified  
364 ribbons (308 in the 1<sup>st</sup> animal and 468 in the 2<sup>nd</sup> animal) were classified as two classes according to  
365 their locations (pillar or modiolar face of the IHCs). Exceptions are 12 (CBA-1) and 24 (CBA-2)  
366 cases with ribbons located at the bottom of IHCs that were grouped to the modiolar ribbons. Note  
367 that ribbons at the IHC pillar face (black dots and triangles,  $0.0117 \pm 0.0049 \mu\text{m}^3$  and  $0.0098 \pm$   
368  $0.0043 \mu\text{m}^3$ ) were significantly smaller than their counterparts at the IHC modiolar face (circles and  
369 open triangles,  $0.0153 \pm 0.0055 \mu\text{m}^3$  and  $0.0145 \pm 0.0074 \mu\text{m}^3$ ). (Two-sample t-test, \*\*\*\* $p <$   
370  $0.0001$ ). **(d)** Cumulative probability distribution of ribbon sizes from all 15 IHCs in the CBA-1 (red  
371 dash line) and 26 IHCs in the CBA-2 (light red dash line), as well as individual IHCs (CBA-1: black  
372 lines; CBA-2: grey lines). Note the remarkable cell-to-cell variability between IHCs. **(e)** Negative  
373 correlation between number and mean size of ribbons in individual IHCs (CBA-1: back dots; CBA-  
374 2: cycles). Linear fit: CBA-1 (red dash line, adjusted- $R^2 = 0.67$ ) and CBA-2 (light red dash line,  
375 adjusted- $R^2 = 0.41$ ).

376

377 **Figure 3. Quantification of afferent and efferent inputs on the <sup>1</sup>SGN-dendrites (a)** Volume  
378 reconstruction of three distinct <sup>1</sup>SGN classes characterized by single-ribbon (unbranched <sup>1</sup>SGN,  
379 left), multi-ribbon (unbranched <sup>1</sup>SGN, middle), and bifurcation (branched <sup>1</sup>SGN, right). Scale bar 5  
380  $\mu\text{m}$ . Right: **(a1-a4)** cross-sections through synaptic structures indicated in (a) with arrows. Single-

381 ribbon AZ (**a1**), dual-ribbon AZ (**a2**), ribbons on a bifurcated <sup>1</sup>SGN-dendrite (**a2 & a3**), and a  
382 representative efferent synapse on a <sup>1</sup>SGN dendritic shaft (**a4**). Scale bar 1  $\mu$ m. (**b**) Display of full-  
383 length unmyelinated <sup>1</sup>SGN-dendrites (green) with presynaptic ribbons (red dots) and efferent  
384 synapses (OC inputs, blue dots) in the 1<sup>st</sup> SBEM dataset. Scale bar 20  $\mu$ m. (**c**) Histograms of the  
385 number of efferent synapses on <sup>1</sup>SGN-dendrites grouped according to ribbon structures. Multi-  
386 ribbon <sup>1</sup>SGNs (red, n = 64) received more efferent innervation than single-ribbon <sup>1</sup>SGNs (black,  
387 n = 170), while the difference in efferent synapse number between <sup>1</sup>SGNs postsynaptic to single  
388 modiolar ribbons (grey, n = 71) and those to single pillar ribbons (black, n = 99) was less prominent.  
389 On average  $5.70 \pm 2.53$  and  $8.82 \pm 3.70$  efferent synapses were found innervating <sup>1</sup>SGN with single-  
390 (black) and multi-ribbon (red) synapses. For <sup>1</sup>SGNs with single-ribbon synapses, the number of  
391 efferent synapses innervating pillar <sup>1</sup>SGNs (black, inset) and modiolar <sup>1</sup>SGNs (grey, inset) were  $5.25$   
392  $\pm 2.19$  and  $6.47 \pm 2.81$ , respectively. Two-sample t-tests suggested statistical significance between  
393 single- and multi-ribbon <sup>1</sup>SGNs (\*\*p < 0.001) and between <sup>1</sup>SGNs with single pillar and modiolar  
394 ribbon synapses (\*\*p = 0.0028). (**d**) Display of full-length unmyelinated <sup>1</sup>SGN-dendrites (grey,  
395 n = 266) in the 2<sup>nd</sup> animal. 30 single- and 30 multi-ribbon <sup>1</sup>SGNs (green) were randomly selected.  
396 Their presynaptic ribbons (red dots) and efferent synapses (OC inputs, blue dots) were annotated.  
397 Scale bar 20  $\mu$ m. (**e**) Histograms of the number of efferent synapses on randomly selected <sup>1</sup>SGN-  
398 dendrites grouped according to ribbon structures. On average  $4.43 \pm 2.16$  (n = 30) and  $7.70 \pm 2.29$   
399 (n = 30) efferent synapses were found innervating <sup>1</sup>SGNs with single- (black) and multi-ribbon (red)  
400 synapses. Two-sample t-test, \*\*\*p < 0.001.

401

402

403 **Figure 4 Efferent innervation of <sup>1</sup>SGN-dendrites: selectivity of LOC and MOC control.**

404 **(a)** Display of a representative LOC fiber (blue) with all 25 innervated <sup>1</sup>SGN-dendrites (green) in

405 the dataset. Scale bar 20  $\mu$ m. **(b-c)** High-resolution exemplary images of a presynaptic LOC terminal

406 contacting an IHC (blue arrow, open) and LOC synapses with a <sup>1</sup>SGN-dendrite (blue arrows, filled).

407 Scale bar 1  $\mu$ m. **(d)** Display of a representative MOC fiber (magenta) with all seven innervated

408 <sup>1</sup>SGN-dendrites (green). Scale bar 20  $\mu$ m. **(e & f)** High-resolution example images of presynaptic

409 MOC synapses onto an OHC (magenta arrow, open) and on a <sup>1</sup>SGN-dendrite (magenta arrows,

410 filled). Scale bar 1  $\mu$ m. **(g)** Boxplot showing the comparison between the number of efferent

411 synapses formed by individual MOC fibers (magenta) and LOC fibers (blue). **(h)** Innervation

412 selectivity of MOC fibers (magenta) and LOC fibers (blue) on <sup>1</sup>SGNs postsynaptic to IHC pillar

413 versus modiolar face, selectivity index  $S = (\#^{1}\text{SGN}_{\text{modiolar}} - \#^{1}\text{SGN}_{\text{pillar}}) / (\#^{1}\text{SGN}_{\text{modiolar}} +$

414  $\#^{1}\text{SGN}_{\text{pillar}})$ . Note that 30 out of 39 MOC fibers exclusively innervated pillar <sup>1</sup>SGNs. **(i)** Boxplot

415 showing the mean ribbon size of MOC-innervated <sup>1</sup>SGNs (magenta) compared to that of LOC-

416 innervated <sup>1</sup>SGNs (blue). **(j)** Cumulative probability distribution of the number of efferent synapses

417 on individual MOC-innervated <sup>1</sup>SGNs (magenta) compared to that of LOC-innervated <sup>1</sup>SGNs (blue).

418 (For g to i, two-sample t-test, \*\*\*p < 0.001; for j, two-sample Kolmogorov-Smirnov test, \*\*\*p <

419 0.001).

420

421 **Figure 5. Spatial arrangement of OC innervation on <sup>1</sup>SGN-dendrites (a)** Cumulative probability

422 distribution of the number of LOC synapses on individual <sup>1</sup>SGNs with pillar single-ribbon (light

423 blue, thin line), modiolar single-ribbon (dark blue, thin line), and multi-ribbon (blue, thick line)

424 contacts. **(b)** Similar to (a), cumulative probability distribution of the number of MOC synapses on

425 individual <sup>1</sup>SGNs with pillar single-ribbon (light magenta, thin line), modiolar single-ribbon (dark  
426 magenta, thin line), and multi-ribbon (magenta, thick line) contacts. Note that MOC synapses were  
427 lacking from more than 50 % modiolar and/or multi-ribbon <sup>1</sup>SGNs (magenta). **(c)** Fraction of  
428 efferent synapses onto <sup>1</sup>SGNs that are classified as LOC synapses with respect to pillar single-ribbon  
429 (small black dots), modiolar single-ribbon (small grey dots), as well as multi-ribbon (large grey dots)  
430 contacts. **(d)** Relative position of MOC synapses (magenta, n = 342) and LOC synapses (blue,  
431 n = 1175) on normalized dendritic paths between the ribbon-type AZ and heminode of <sup>1</sup>SGN-  
432 dendrites. Inset: dendritic path lengths in  $\mu\text{m}$  measured from OC synapses to the heminode. **(e & f)**  
433 3D-illustration showing spatial segregation of LOC synapses (blue) from MOC synapses (magenta)  
434 (e), as well as traced trajectories of LOC (blue) from those of MOC fibers (magenta) (f). TC: Tunnel  
435 of Corti. (For a, b and d two-sample Kolmogorov-Smirnov test, \*\*\* $p < 0.001$ ).

436

437 **Suppl. Figure 1. Quantification of tracing accuracy** **(a)** 7-fold skeletonization of the <sup>1</sup>SGN-  
438 dendrites and an efferent axon traced by trained non-experts in the dataset. For <sup>1</sup>SGN-dendrites, all  
439 tracing started from the ribbon-type AZ and proceeded to the heminode of the <sup>1</sup>SGN-dendrite. Grey  
440 spheres represented the nuclei of IHCs which were arranged in a staggered manner. Scale bar 5  $\mu\text{m}$ .  
441 **(b-d)** RESCOP analysis of traceability: histogram of edge votes **(b)**, estimated edge-detection  
442 probability  $p(p_e)$  distribution for all traced neurites **(c)**, and prediction of tracing accuracy as a  
443 function of annotation redundancy **(d)**.

444

445 **Suppl. Figure 2. Morphology of branched <sup>1</sup>SGN-dendrites.** **(a)** Ten example skeletons of  
446 branched <sup>1</sup>SGN-dendrites, on which ribbon synapses and OC synapses were indicated by red and

447 blue dots, respectively. Scale bar 10  $\mu\text{m}$ .

448

449 **Suppl. Figure 3. Similar efferent innervation of postsynaptic <sup>1</sup>SGN boutons at the modiolar**

450 **versus pillar IHC faces. (a)** Exemplary image of a <sup>1</sup>SGN bouton (green). Efferent synapse

451 (indicated by physical contact of SV-filled terminal) was marked by red asterisk and those within a

452 4- $\mu\text{m}$ -sized box (white) but without physical contact by white asterisks. Scale bar 1  $\mu\text{m}$ . **(b)** Boxplot

453 of efferent synapse number on <sup>1</sup>SGN boutons postsynaptic to IHC modiolar face (left) versus pillar

454 face (right). Two-sample t test:  $p = 0.0837$ .

455

456 **Suppl. Figure 4. Same spatial arrangement of efferent innervation in the 2<sup>nd</sup> animal. (a)**

457 Dendritic pathlengths in  $\mu\text{m}$  measured from efferent synapses to the heminode. **(b)** Relative position

458 of MOC synapses (magenta,  $n = 86$ ) and LOC synapses (blue,  $n = 286$ ) on normalized dendritic

459 paths between ribbon AZ and heminode of <sup>1</sup>SGN-dendrites.

460

461 **Material and Methods**

462 **Animals.** CBA/Ca mice were purchased from Sino-British SIPPR/BK Lab. Animal Ltd (Shanghai,  
463 China). This study was conducted at the Shanghai Institute of Precision Medicine and Ear Institute  
464 of Shanghai Ninth People's Hospital. All procedures were reviewed and approved by the  
465 Institutional Authority for Laboratory Animal Care of the hospital (SH9H-2019-A387-1).

466

467 **Whole cochlea EM preparation.** Animals were anesthetized through intraperitoneal injection of  
468 chloride hydrate (500 mg/kg) and temporal bones were removed after decapitation. The cochleae  
469 were fixed by perfusion through the round window with ice-cold fixative mixture containing 0.08 M  
470 cacodylate (pH 7.4), 2 % freshly-made paraformaldehyde (Sigma), and 2.5 % glutaraldehyde  
471 (Sigma), and then immersion-fixed for 5 hours, followed by a 4-hour decalcification in the same  
472 fixative with addition of 5 % EDTA (ethylenediaminetetraacetic acid, Sigma-Aldrich) at 4 °C.

473 The *en bloc* EM staining was performed following the previously published protocol<sup>79</sup> with  
474 modifications. In brief, the decalcified cochleae were washed twice in 0.15 M cacodylate (pH 7.4)  
475 for 30 min each and sequentially immersed in 2 % OsO<sub>4</sub> (Ted Pella), 2.5 % ferrocyanide (Sigma),  
476 and again 2 % OsO<sub>4</sub> at room temperature for 2, 2, and 1.5 hours, respectively, without intermediate  
477 washing step. All staining solutions were buffered with 0.15 M cacodylate (pH 7.4). After being  
478 washed twice in nanopore filtered water for 30 min each, the cochleae were incubated at room  
479 temperature in filtered thiocarbonhydrazide (saturated aqueous solution, Sigma) for 1 hour,  
480 unbuffered OsO<sub>4</sub> aqueous solution for 2 hours and lead aspartate solution (0.03 M, pH 5.0 adjusted  
481 by KOH, EMS) at 50 °C for 2 hours. Between steps, double rinses in nanopore filtered water for 30  
482 min each were performed.



483 For embedding, the cochleae were first dehydrated through a graded acetone series (50 %, 75 %,  
484 90 %, 30 min each, all cooled at 4 °C) into pure acetone (3 × 100 %, 30 min at room temperature),  
485 followed by sequential infiltration with 1:1 and 1:2 mixtures of acetone and Spurr's resin monomer  
486 (4.1 g ERL 4221, 0.95 g DER 736, 5.9 g NSA and 1 % DMAE; Sigma-Aldrich) at room temperature  
487 for 6 hours each on a rotator. Infiltrated cochleae were then incubated in pure resin overnight before  
488 being placed in embedding molds (Polyscience, Germany) and incubated in a pre-warmed oven  
489 (70 °C) for 72 hours.

490

491 **SBEM imaging of cochlea.** Embedded samples were trimmed to a block-face of  $\sim 800 \times 800 \mu\text{m}^2$   
492 and imaged using a field-emission scanning EM (Gemini300, Zeiss) equipped with an in-chamber  
493 ultramicrotome (3ViewXP, Gatan) and back-scattered electron detector (Onpont, Gatan). For the 1<sup>st</sup>  
494 CBA dataset, serial images were acquired in single tile mode (20,000 × 15,000 pixels) of 11 nm  
495 pixel size and nominal cutting thickness of 40 nm; incident beam energy 2 keV; dwell time 1  $\mu\text{s}$ .  
496 2500 slices were collected. For the 2<sup>nd</sup> CBA dataset, 2952 serial images (16,000 × 9,000 pixels)  
497 were acquired at 12 nm pixel size and nominal cutting thickness of 50 nm; incident beam energy 2  
498 eV; dwell time 1.5  $\mu\text{s}$ . For both datasets focal charge compensation<sup>80</sup> was set to 100 % with a high  
499 vacuum chamber pressure of  $\sim 2.8 \times 10^{-3}$  mbar. The datasets were aligned using self-written  
500 MATLAB script based on cross-correlation maximum between consecutive slices. Then the aligned  
501 datasets were split into cubes (128 × 128 × 128 voxels) for viewing and neurite-tracing in a browser-  
502 based annotation tool (webKNOSSOS<sup>56</sup>).

503

504 **Neurite reconstruction and traceability test.** Seed points were generated from 17 annotated

505 afferent and one efferent terminal beneath an IHC at a central region of the dataset. These  
506 coordinates were delivered to annotators as starting points for neurite-tracing in all directions within  
507 the data volume. This yielded  $19 \times 7 = 133$  skeletons with a total length of 7.185 mm, which were  
508 further analyzed using the RESCOP<sup>57</sup> routine as described previously<sup>79</sup>. In brief, each set of seven  
509 redundant skeletons was compared computing the number of ‘pro’ votes and total votes for each  
510 edge in each skeleton-tracing. This resulted in a vote histogram that was corrected for the  
511 redundancy of each tracing, yielding the measured vote histogram. Next, the underlying prior of  
512 edge probability  $p(p_e)$  was determined by fitting the vote histogram under the simplifying  
513 assumption that tracing decisions were independent between tracers and locations. Then, the  
514 predicted mean error-free path length as a function of the number of tracings per seed point (‘tracing  
515 redundancy’) was computed from the fitted prior  $p(p_e)$  for the setting of annotators reconstructing a  
516 neurite.

517

518 **Ribbon size measurement and synapse counting.** The ribbon size was measured by counting  
519 voxels which belonged to individual ribbon structures via volume-tracing tool in webKNOSSOS.  
520 Efferent synapse annotation was done by three independent annotators on traced skeletons and the  
521 result was proof-read by inspection of a 4<sup>th</sup> annotator at annotated locations. All data analysis  
522 including statistic tests were conducted using self-written script and build-in functions in MATLAB  
523 (Mathworks).

524

525 **Additional information**

526 **Suppl. Video 1:** Down-sampled cochlea SBEM data with alignment (scale bar 10  $\mu\text{m}$ )

527 **Suppl. Video 2:** High resolution cochlea SBEM data in the ISB region (scale bar 2  $\mu$ m)

528

529 **References**

- 530 1 Moser, T., Grabner, C. P. & Schmitz, F. Sensory Processing at Ribbon Synapses in the Retina  
531 and the Cochlea. *Physiol Rev* **100**, 103-144, doi:10.1152/physrev.00026.2018 (2020).
- 532 2 Fettiplace, R. Hair Cell Transduction, Tuning, and Synaptic Transmission in the Mammalian  
533 Cochlea. *Compr Physiol* **7**, 1197-1227, doi:10.1002/cphy.c160049 (2017).
- 534 3 Huet, A. *et al.* Sound Coding in the Auditory Nerve: From Single Fiber Activity to Cochlear  
535 Mass Potentials in Gerbils. *Neuroscience* **407**, 83-92,  
536 doi:10.1016/j.neuroscience.2018.10.010 (2019).
- 537 4 Reijntjes, D. O. J. & Pyott, S. J. The afferent signaling complex: Regulation of type I spiral  
538 ganglion neuron responses in the auditory periphery. *Hear Res* **336**, 1-16,  
539 doi:10.1016/j.heares.2016.03.011 (2016).
- 540 5 Fuchs, P. A. & Lauer, A. M. Efferent Inhibition of the Cochlea. *Cold Spring Harb Perspect*  
541 *Med* **9**, doi:10.1101/cshperspect.a033530 (2019).
- 542 6 Liberman, M. C. Single-neuron labeling in the cat auditory nerve. *Science* **216**, 1239-1241,  
543 doi:10.1126/science.7079757 (1982).
- 544 7 Kiang, N. Y. S. *Discharge patterns of single fibers in the cat's auditory nerve. With the*  
545 *assistance of Takeshi Watanabe [et al.]*. (M. I. T. Press, 1965).
- 546 8 Safieddine, S., El-Amraoui, A. & Petit, C. The auditory hair cell ribbon synapse: from  
547 assembly to function. *Annu Rev Neurosci* **35**, 509-528, doi:10.1146/annurev-neuro-  
548 061010-113705 (2012).
- 549 9 Frank, T., Khimich, D., Neef, A. & Moser, T. Mechanisms contributing to synaptic Ca<sup>2+</sup>  
550 signals and their heterogeneity in hair cells. *Proc Natl Acad Sci U S A* **106**, 4483-4488,  
551 doi:10.1073/pnas.0813213106 (2009).
- 552 10 Meyer, A. C. *et al.* Tuning of synapse number, structure and function in the cochlea. *Nat*  
553 *Neurosci* **12**, 444-453, doi:10.1038/nn.2293 (2009).
- 554 11 Liberman, L. D., Wang, H. & Liberman, M. C. Opposing gradients of ribbon size and AMPA  
555 receptor expression underlie sensitivity differences among cochlear-nerve/hair-cell  
556 synapses. *J Neurosci* **31**, 801-808, doi:10.1523/JNEUROSCI.3389-10.2011 (2011).
- 557 12 Ohn, T. L. *et al.* Hair cells use active zones with different voltage dependence of Ca<sup>2+</sup>  
558 influx to decompose sounds into complementary neural codes. *Proc Natl Acad Sci U S A*  
559 **113**, E4716-4725, doi:10.1073/pnas.1605737113 (2016).
- 560 13 Michanski, S. *et al.* Mapping developmental maturation of inner hair cell ribbon synapses  
561 in the apical mouse cochlea. *Proc Natl Acad Sci U S A* **116**, 6415-6424,  
562 doi:10.1073/pnas.1812029116 (2019).
- 563 14 Neef, J. *et al.* Quantitative optical nanophysiology of Ca<sup>2+</sup> signaling at inner hair cell  
564 active zones. *Nat Commun* **9**, 290, doi:10.1038/s41467-017-02612-y (2018).
- 565 15 Liberman, M. C., Dodds, L. W. & Pierce, S. Afferent and efferent innervation of the cat  
566 cochlea: quantitative analysis with light and electron microscopy. *J Comp Neurol* **301**,  
567 443-460, doi:10.1002/cne.903010309 (1990).

- 568 16 Taberner, A. M. & Liberman, M. C. Response properties of single auditory nerve fibers in  
569 the mouse. *J Neurophysiol* **93**, 557-569, doi:10.1152/jn.00574.2004 (2005).
- 570 17 Shrestha, B. R. *et al.* Sensory Neuron Diversity in the Inner Ear Is Shaped by Activity. *Cell*  
571 **174**, 1229-1246 e1217, doi:10.1016/j.cell.2018.07.007 (2018).
- 572 18 Sun, S. *et al.* Hair Cell Mechanotransduction Regulates Spontaneous Activity and Spiral  
573 Ganglion Subtype Specification in the Auditory System. *Cell* **174**, 1247-1263 e1215,  
574 doi:10.1016/j.cell.2018.07.008 (2018).
- 575 19 Petitpre, C. *et al.* Neuronal heterogeneity and stereotyped connectivity in the auditory  
576 afferent system. *Nat Commun* **9**, 3691, doi:10.1038/s41467-018-06033-3 (2018).
- 577 20 Liberman, M. C. Auditory-nerve response from cats raised in a low-noise chamber. *J*  
578 *Acoust Soc Am* **63**, 442-455, doi:10.1121/1.381736 (1978).
- 579 21 Winter, I. M., Robertson, D. & Yates, G. K. Diversity of characteristic frequency rate-  
580 intensity functions in guinea pig auditory nerve fibres. *Hear Res* **45**, 191-202,  
581 doi:10.1016/0378-5955(90)90120-e (1990).
- 582 22 Sachs, M. B. & Abbas, P. J. Rate versus level functions for auditory-nerve fibers in cats:  
583 tone-burst stimuli. *J Acoust Soc Am* **56**, 1835-1847, doi:10.1121/1.1903521 (1974).
- 584 23 Kantardzhieva, A., Liberman, M. C. & Sewell, W. F. Quantitative analysis of ribbons, vesicles,  
585 and cisterns at the cat inner hair cell synapse: correlations with spontaneous rate. *J Comp*  
586 *Neurol* **521**, 3260-3271, doi:10.1002/cne.23345 (2013).
- 587 24 Liberman, M. C. Morphological differences among radial afferent fibers in the cat cochlea:  
588 an electron-microscopic study of serial sections. *Hear Res* **3**, 45-63, doi:10.1016/0378-  
589 5955(80)90007-6 (1980).
- 590 25 Merchan-Perez, A. & Liberman, M. C. Ultrastructural differences among afferent synapses  
591 on cochlear hair cells: correlations with spontaneous discharge rate. *J Comp Neurol* **371**,  
592 208-221, doi:10.1002/(SICI)1096-9861(19960722)371:2<208::AID-CNE2>3.0.CO;2-6  
593 (1996).
- 594 26 Furman, A. C., Kujawa, S. G. & Liberman, M. C. Noise-induced cochlear neuropathy is  
595 selective for fibers with low spontaneous rates. *J Neurophysiol* **110**, 577-586,  
596 doi:10.1152/jn.00164.2013 (2013).
- 597 27 Song, Q. *et al.* Coding deficits in hidden hearing loss induced by noise: the nature and  
598 impacts. *Sci Rep* **6**, 25200, doi:10.1038/srep25200 (2016).
- 599 28 Zhang, L., Engler, S., Koepcke, L., Steenken, F. & Koppl, C. Concurrent gradients of ribbon  
600 volume and AMPA-receptor patch volume in cochlear afferent synapses on gerbil inner  
601 hair cells. *Hear Res* **364**, 81-89, doi:10.1016/j.heares.2018.03.028 (2018).
- 602 29 Heil, P. & Peterson, A. J. Basic response properties of auditory nerve fibers: a review. *Cell*  
603 *Tissue Res* **361**, 129-158, doi:10.1007/s00441-015-2177-9 (2015).
- 604 30 Pangrsic, T., Singer, J. H. & Koschak, A. Voltage-Gated Calcium Channels: Key Players in  
605 Sensory Coding in the Retina and the Inner Ear. *Physiol Rev* **98**, 2063-2096,  
606 doi:10.1152/physrev.00030.2017 (2018).
- 607 31 Warr, W. B. & Guinan, J. J., Jr. Efferent innervation of the organ of corti: two separate  
608 systems. *Brain Res* **173**, 152-155, doi:10.1016/0006-8993(79)91104-1 (1979).
- 609 32 Evans, M. G., Lagostena, L., Darbon, P. & Mammano, F. Cholinergic control of membrane  
610 conductance and intracellular free Ca<sup>2+</sup> in outer hair cells of the guinea pig cochlea. *Cell*  
611 *Calcium* **28**, 195-203, doi:10.1054/ceca.2000.0145 (2000).

- 612 33 Dallos, P. *et al.* Acetylcholine, outer hair cell electromotility, and the cochlear amplifier. *J*  
613 *Neurosci* **17**, 2212-2226 (1997).
- 614 34 Blanchet, C., ErosteGUI, C., Sugasawa, M. & Dulon, D. Acetylcholine-induced potassium  
615 current of guinea pig outer hair cells: its dependence on a calcium influx through  
616 nicotinic-like receptors. *J Neurosci* **16**, 2574-2584 (1996).
- 617 35 Nouvian, R., Eybalin, M. & Puel, J. L. Cochlear efferents in developing adult and  
618 pathological conditions. *Cell Tissue Res* **361**, 301-309, doi:10.1007/s00441-015-2158-z  
619 (2015).
- 620 36 Yin, Y., Liberman, L. D., Maison, S. F. & Liberman, M. C. Olivocochlear innervation maintains  
621 the normal modiolar-pillar and habenular-cuticular gradients in cochlear synaptic  
622 morphology. *J Assoc Res Otolaryngol* **15**, 571-583, doi:10.1007/s10162-014-0462-z  
623 (2014).
- 624 37 Eybalin, M. Neurotransmitters and neuromodulators of the mammalian cochlea. *Physiol*  
625 *Rev* **73**, 309-373, doi:10.1152/physrev.1993.73.2.309 (1993).
- 626 38 Ruel, J. *et al.* Physiology, pharmacology and plasticity at the inner hair cell synaptic  
627 complex. *Hear Res* **227**, 19-27, doi:10.1016/j.heares.2006.08.017 (2007).
- 628 39 Darrow, K. N., Maison, S. F. & Liberman, M. C. Cochlear efferent feedback balances  
629 interaural sensitivity. *Nat Neurosci* **9**, 1474-1476, doi:10.1038/nn1807 (2006).
- 630 40 Irving, S., Moore, D. R., Liberman, M. C. & Sumner, C. J. Olivocochlear efferent control in  
631 sound localization and experience-dependent learning. *J Neurosci* **31**, 2493-2501,  
632 doi:10.1523/JNEUROSCI.2679-10.2011 (2011).
- 633 41 Eybalin, M., Caicedo, A., Renard, N., Ruel, J. & Puel, J. L. Transient Ca<sup>2+</sup>-permeable AMPA  
634 receptors in postnatal rat primary auditory neurons. *Eur J Neurosci* **20**, 2981-2989,  
635 doi:10.1111/j.1460-9568.2004.03772.x (2004).
- 636 42 Ehret, G. & Frankenreiter, M. Quantitative analysis of cochlear structures in the house  
637 mouse in relation to mechanisms of acoustical information processing. *Journal of*  
638 *Comparative Physiology* **122**, 66-85, doi:<https://doi.org/10.1007/BF00611249> (1977).
- 639 43 Maison, S. F., Adams, J. C. & Liberman, M. C. Olivocochlear innervation in the mouse:  
640 immunocytochemical maps, crossed versus uncrossed contributions, and transmitter  
641 colocalization. *J Comp Neurol* **455**, 406-416, doi:10.1002/cne.10490 (2003).
- 642 44 Warr, W. B. & Boche, J. E. Diversity of axonal ramifications belonging to single lateral and  
643 medial olivocochlear neurons. *Exp Brain Res* **153**, 499-513, doi:10.1007/s00221-003-  
644 1682-3 (2003).
- 645 45 Darrow, K. N., Simons, E. J., Dodds, L. & Liberman, M. C. Dopaminergic innervation of the  
646 mouse inner ear: evidence for a separate cytochemical group of cochlear efferent fibers.  
647 *J Comp Neurol* **498**, 403-414, doi:10.1002/cne.21050 (2006).
- 648 46 Fuchs, P. A., Lehar, M. & Hiel, H. Ultrastructure of cisternal synapses on outer hair cells of  
649 the mouse cochlea. *J Comp Neurol* **522**, 717-729, doi:10.1002/cne.23478 (2014).
- 650 47 Thiers, F. A., Nadol, J. B., Jr. & Liberman, M. C. Reciprocal synapses between outer hair  
651 cells and their afferent terminals: evidence for a local neural network in the mammalian  
652 cochlea. *J Assoc Res Otolaryngol* **9**, 477-489, doi:10.1007/s10162-008-0135-x (2008).
- 653 48 Liberman, M. C. Efferent synapses in the inner hair cell area of the cat cochlea: an electron  
654 microscopic study of serial sections. *Hear Res* **3**, 189-204, doi:10.1016/0378-  
655 5955(80)90046-5 (1980).

- 656 49 Hashimoto, S., Kimura, R. S. & Takasaka, T. Computer-aided three-dimensional  
657 reconstruction of the inner hair cells and their nerve endings in the guinea pig cochlea.  
658 *Acta Otolaryngol* **109**, 228-234, doi:10.3109/00016489009107438 (1990).
- 659 50 Nadol, J. B., Jr. Serial section reconstruction of the neural poles of hair cells in the human  
660 organ of Corti. II. outer hair cells. *Laryngoscope* **93**, 780-791, doi:10.1288/00005537-  
661 198306000-00015 (1983).
- 662 51 Nadol, J. B., Jr. Serial section reconstruction of the neural poles of hair cells in the human  
663 organ of Corti. I. Inner hair cells. *Laryngoscope* **93**, 599-614,  
664 doi:10.1002/lary.1983.93.5.599 (1983).
- 665 52 Brown, M. C. Morphology of labeled efferent fibers in the guinea pig cochlea. *J Comp*  
666 *Neurol* **260**, 605-618, doi:10.1002/cne.902600412 (1987).
- 667 53 Brown, M. C. Morphology of labeled afferent fibers in the guinea pig cochlea. *J Comp*  
668 *Neurol* **260**, 591-604, doi:10.1002/cne.902600411 (1987).
- 669 54 Denk, W. & Horstmann, H. Serial block-face scanning electron microscopy to reconstruct  
670 three-dimensional tissue nanostructure. *PLoS Biol* **2**, e329,  
671 doi:10.1371/journal.pbio.0020329 (2004).
- 672 55 Willott, J. F. *Handbook of mouse auditory research : from behavior to molecular biology*.  
673 (CRC Press, 2001).
- 674 56 Boergens, K. M. *et al.* webKnossos: efficient online 3D data annotation for connectomics.  
675 *Nat Methods* **14**, 691-694, doi:10.1038/nmeth.4331 (2017).
- 676 57 Helmstaedter, M., Briggman, K. L. & Denk, W. High-accuracy neurite reconstruction for  
677 high-throughput neuroanatomy. *Nat Neurosci* **14**, 1081-1088, doi:10.1038/nn.2868  
678 (2011).
- 679 58 Helmstaedter, M. Cellular-resolution connectomics: challenges of dense neural circuit  
680 reconstruction. *Nat Methods* **10**, 501-507, doi:10.1038/nmeth.2476 (2013).
- 681 59 Kornfeld, J. & Denk, W. Progress and remaining challenges in high-throughput volume  
682 electron microscopy. *Curr Opin Neurobiol* **50**, 261-267, doi:10.1016/j.conb.2018.04.030  
683 (2018).
- 684 60 Briggman, K. L. & Bock, D. D. Volume electron microscopy for neuronal circuit  
685 reconstruction. *Curr Opin Neurobiol* **22**, 154-161, doi:10.1016/j.conb.2011.10.022 (2012).
- 686 61 Fernandez, C. The innervation of the cochlea (guinea pig). *Laryngoscope* **61**, 1152-1172,  
687 doi:10.1288/00005537-195112000-00002 (1951).
- 688 62 Spoenclin, H. Innervation patterns in the organ of corti of the cat. *Acta Otolaryngol* **67**,  
689 239-254, doi:10.3109/00016486909125448 (1969).
- 690 63 Stamatakis, S., Francis, H. W., Lehar, M., May, B. J. & Ryugo, D. K. Synaptic alterations at  
691 inner hair cells precede spiral ganglion cell loss in aging C57BL/6J mice. *Hear Res* **221**,  
692 104-118, doi:10.1016/j.heares.2006.07.014 (2006).
- 693 64 Buran, B. N. *et al.* Onset coding is degraded in auditory nerve fibers from mutant mice  
694 lacking synaptic ribbons. *J Neurosci* **30**, 7587-7597, doi:10.1523/JNEUROSCI.0389-  
695 10.2010 (2010).
- 696 65 Fischer, F. P. Quantitative analysis of the innervation of the chicken basilar papilla. *Hear*  
697 *Res* **61**, 167-178, doi:10.1016/0378-5955(92)90048-r (1992).
- 698 66 Klinke, R. Neurotransmission in the inner ear. *Hear Res* **22**, 235-243, doi:10.1016/0378-  
699 5955(86)90100-0 (1986).

- 700 67 Jean, P. *et al.* The synaptic ribbon is critical for sound encoding at high rates and with  
701 temporal precision. *Elife* **7**, doi:ARTN e29275  
702 10.7554/eLife.29275 (2018).
- 703 68 Guinan, J. J., Jr. & Gifford, M. L. Effects of electrical stimulation of efferent olivocochlear  
704 neurons on cat auditory-nerve fibers. I. Rate-level functions. *Hear Res* **33**, 97-113,  
705 doi:10.1016/0378-5955(88)90023-8 (1988).
- 706 69 Winslow, R. L. & Sachs, M. B. Effect of electrical stimulation of the crossed olivocochlear  
707 bundle on auditory nerve response to tones in noise. *J Neurophysiol* **57**, 1002-1021,  
708 doi:10.1152/jn.1987.57.4.1002 (1987).
- 709 70 Liberman, M. C. & Brown, M. C. Physiology and anatomy of single olivocochlear neurons  
710 in the cat. *Hear Res* **24**, 17-36, doi:10.1016/0378-5955(86)90003-1 (1986).
- 711 71 Felix, D. & Ehrenberger, K. The efferent modulation of mammalian inner hair cell afferents.  
712 *Hear Res* **64**, 1-5, doi:10.1016/0378-5955(92)90163-h (1992).
- 713 72 Maison, S. F. *et al.* Dopaminergic signaling in the cochlea: receptor expression patterns  
714 and deletion phenotypes. *J Neurosci* **32**, 344-355, doi:10.1523/JNEUROSCI.4720-11.2012  
715 (2012).
- 716 73 Wu, J. S. *et al.* Sound exposure dynamically induces dopamine synthesis in cholinergic  
717 LOC efferents for feedback to auditory nerve fibers. *Elife* **9**, doi:10.7554/eLife.52419 (2020).
- 718 74 Kujawa, S. G. & Liberman, M. C. Adding insult to injury: cochlear nerve degeneration after  
719 "temporary" noise-induced hearing loss. *J Neurosci* **29**, 14077-14085,  
720 doi:10.1523/JNEUROSCI.2845-09.2009 (2009).
- 721 75 Lauer, A. M., Fuchs, P. A., Ryugo, D. K. & Francis, H. W. Efferent synapses return to inner  
722 hair cells in the aging cochlea. *Neurobiol Aging* **33**, 2892-2902,  
723 doi:10.1016/j.neurobiolaging.2012.02.007 (2012).
- 724 76 Fernandez, K. A., Jeffers, P. W., Lall, K., Liberman, M. C. & Kujawa, S. G. Aging after noise  
725 exposure: acceleration of cochlear synaptopathy in "recovered" ears. *J Neurosci* **35**, 7509-  
726 7520, doi:10.1523/JNEUROSCI.5138-14.2015 (2015).
- 727 77 Sergeyenko, Y., Lall, K., Liberman, M. C. & Kujawa, S. G. Age-related cochlear synaptopathy:  
728 an early-onset contributor to auditory functional decline. *J Neurosci* **33**, 13686-13694,  
729 doi:10.1523/JNEUROSCI.1783-13.2013 (2013).
- 730 78 Knudson, I. M., Shera, C. A. & Melcher, J. R. Increased contralateral suppression of  
731 otoacoustic emissions indicates a hyperresponsive medial olivocochlear system in humans  
732 with tinnitus and hyperacusis. *J Neurophysiol* **112**, 3197-3208, doi:10.1152/jn.00576.2014  
733 (2014).
- 734 79 Hua, Y., Laserstein, P. & Helmstaedter, M. Large-volume en-bloc staining for electron  
735 microscopy-based connectomics. *Nat Commun* **6**, 7923, doi:10.1038/ncomms8923  
736 (2015).
- 737 80 Deerinck, T. J. *et al.* High-performance serial block-face SEM of nonconductive biological  
738 samples enabled by focal gas injection-based charge compensation. *J Microsc* **270**, 142-  
739 149, doi:10.1111/jmi.12667 (2018).

740

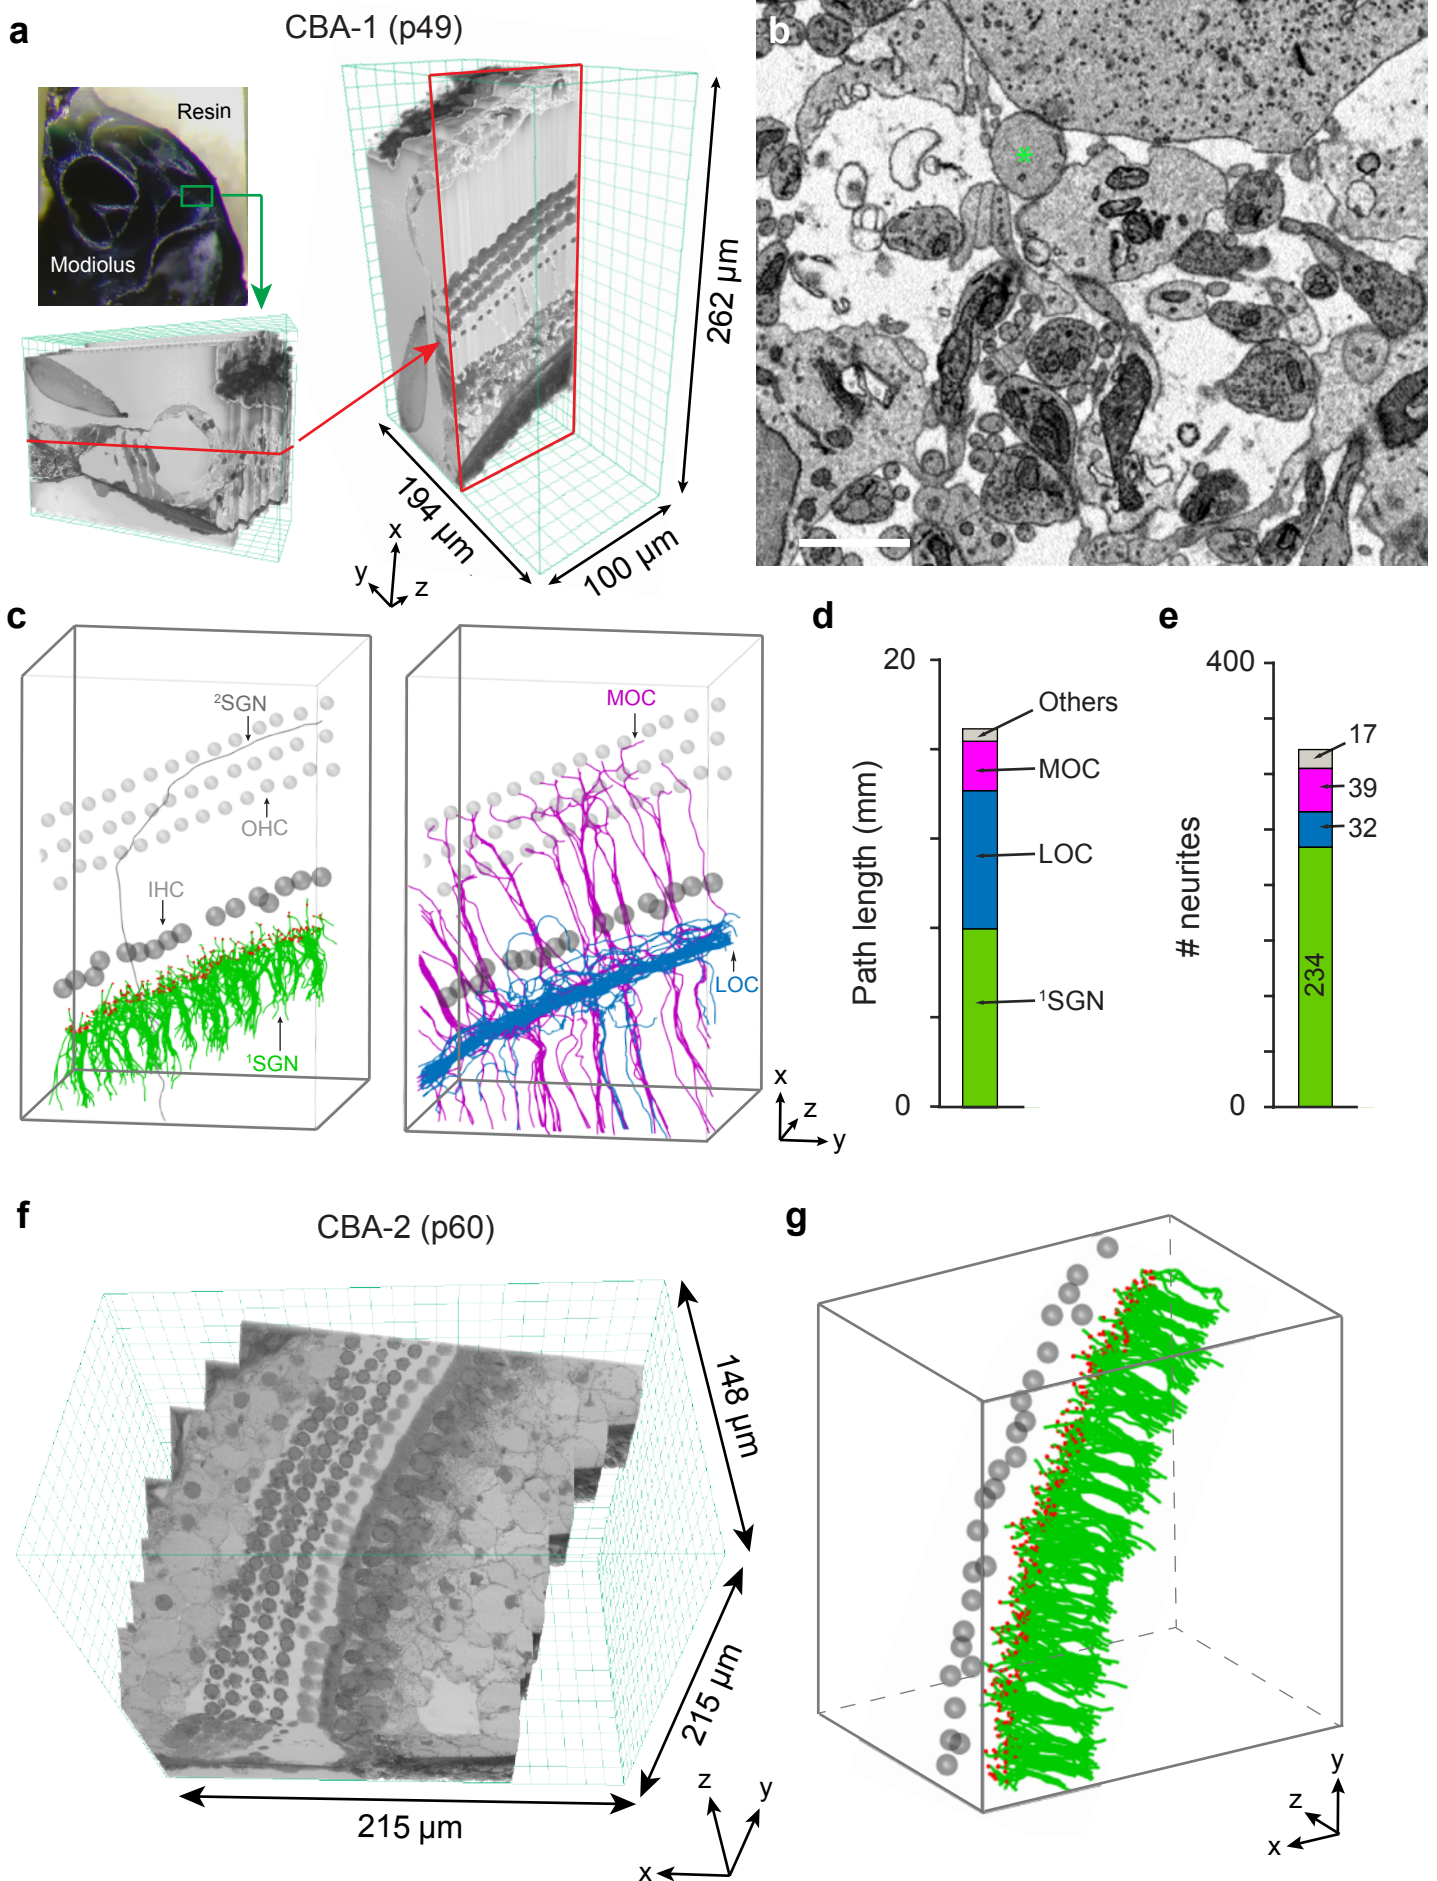

**Figure 1**



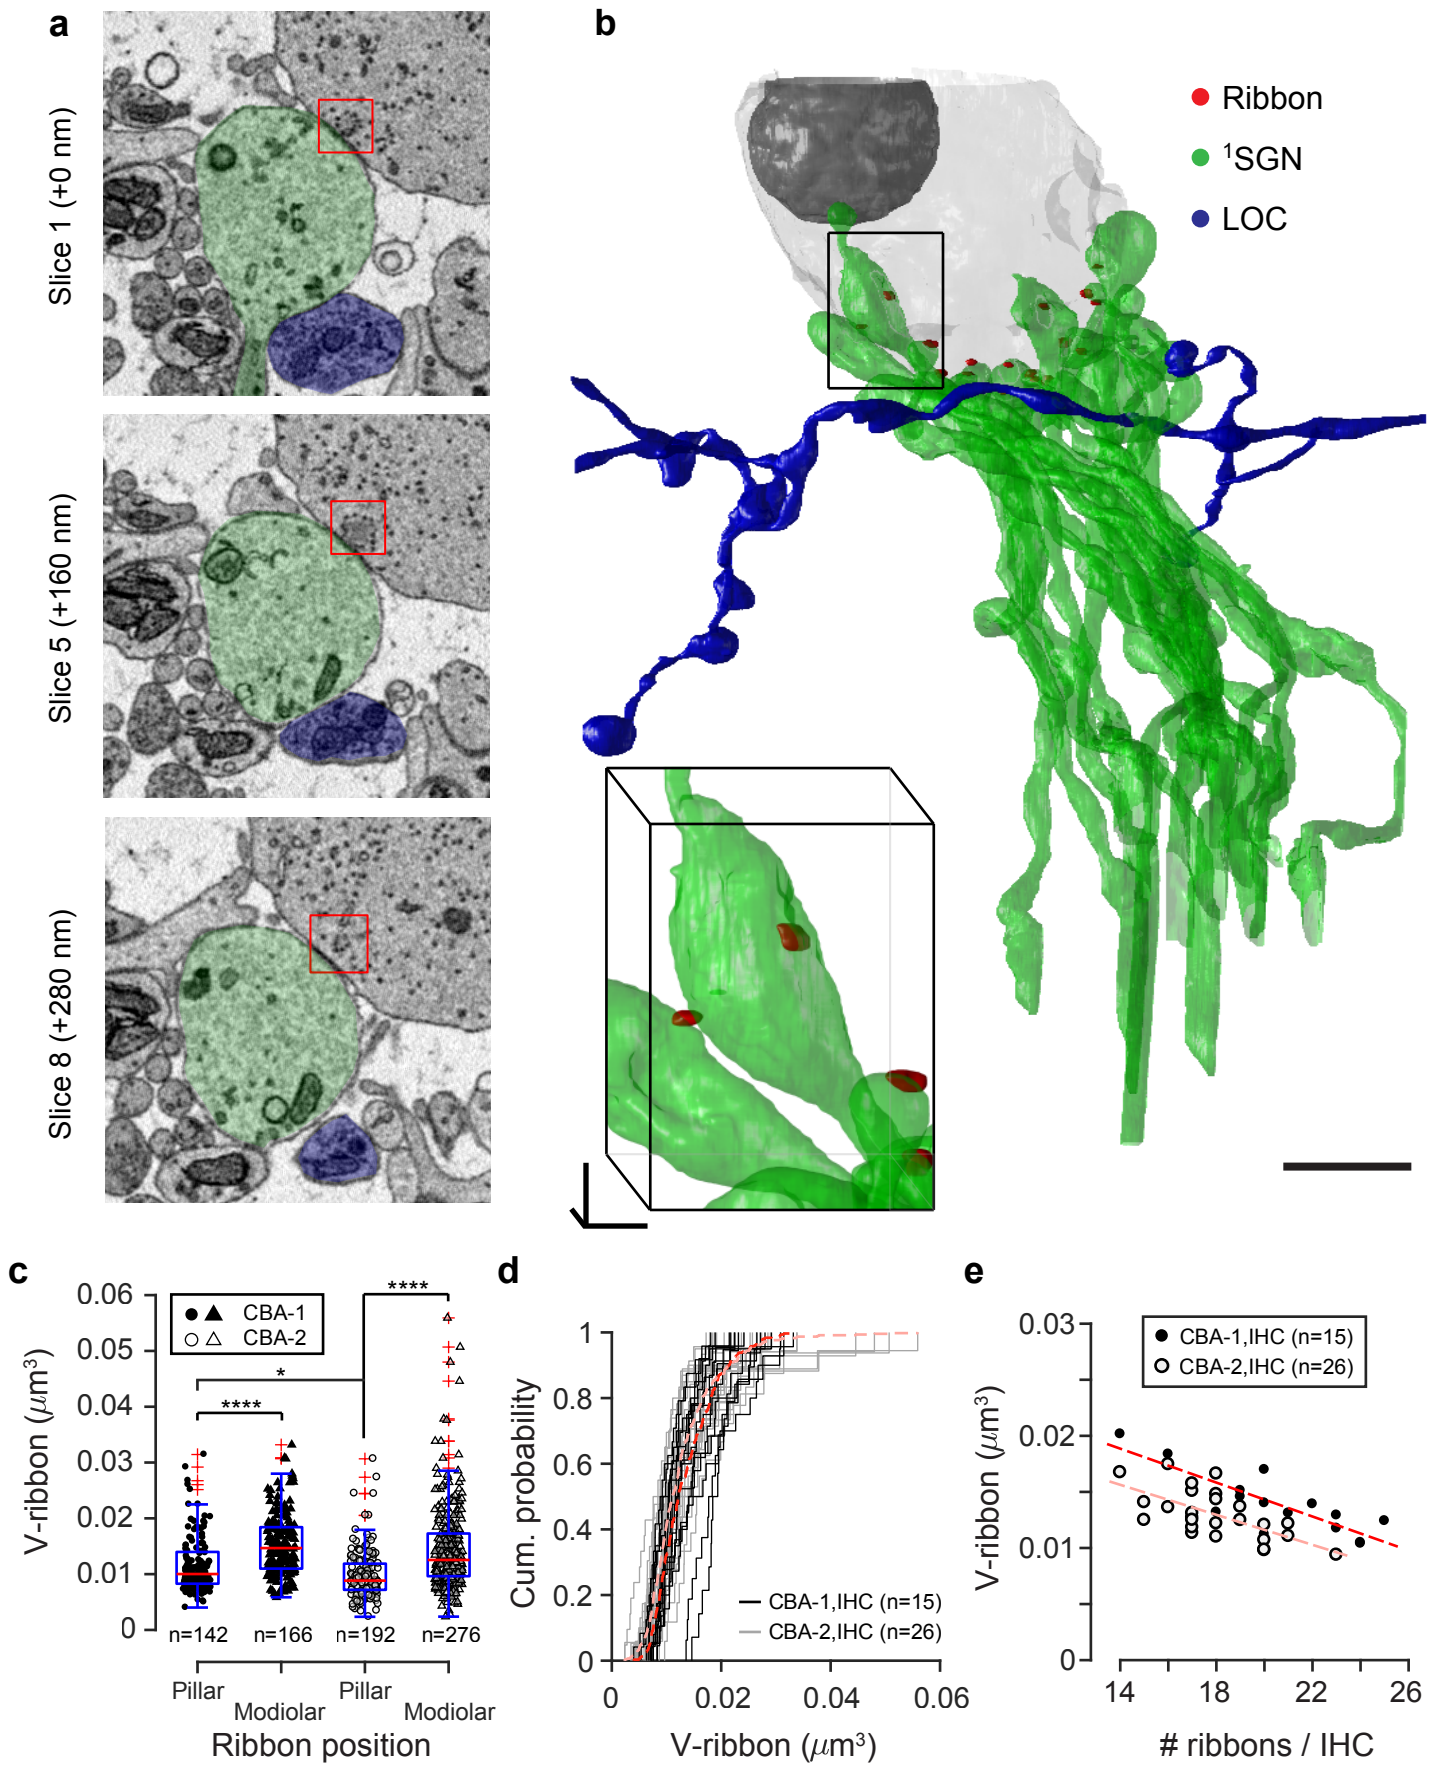

Figure 2

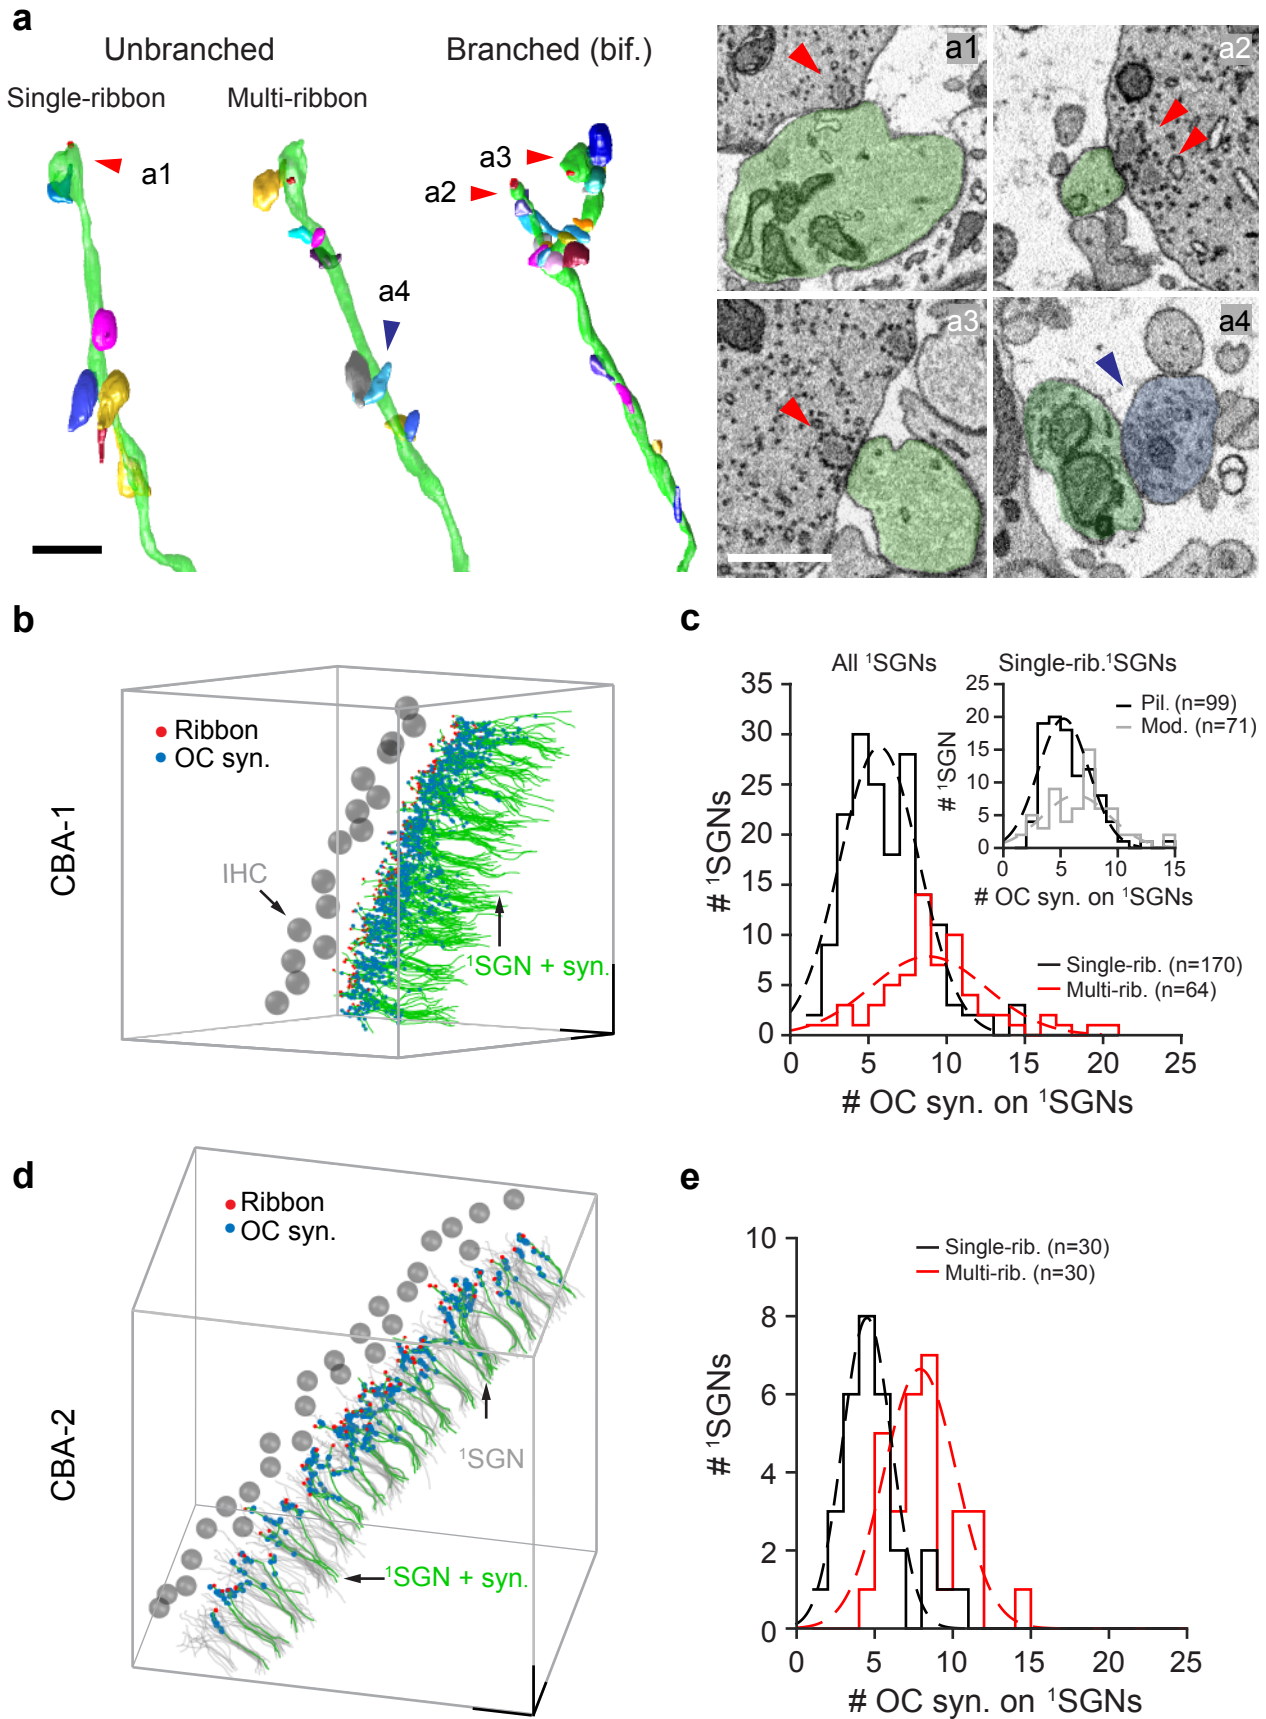

**Figure 3**

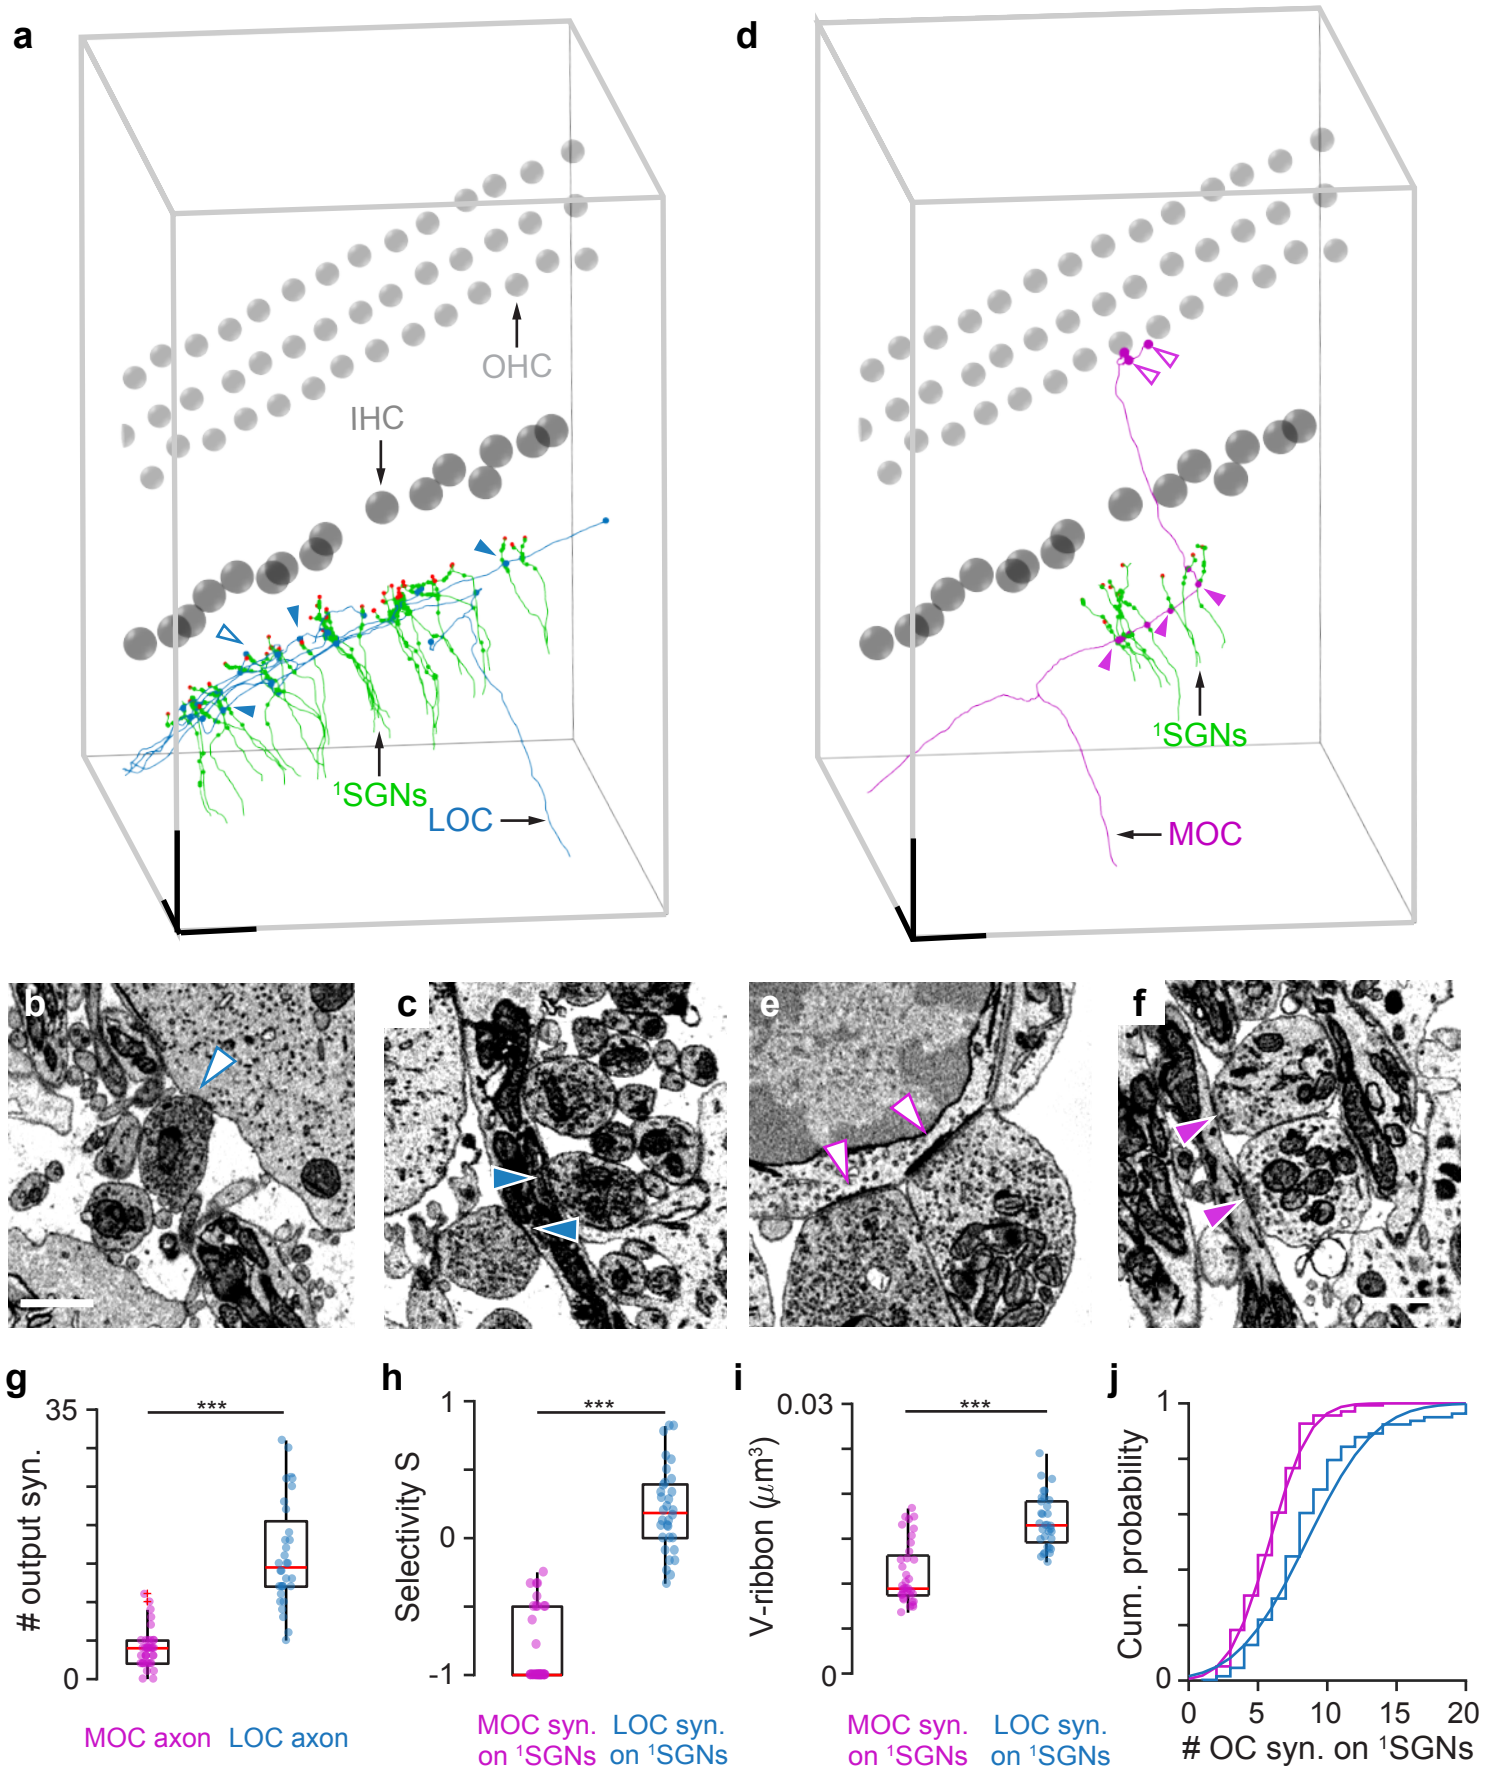

Figure 4

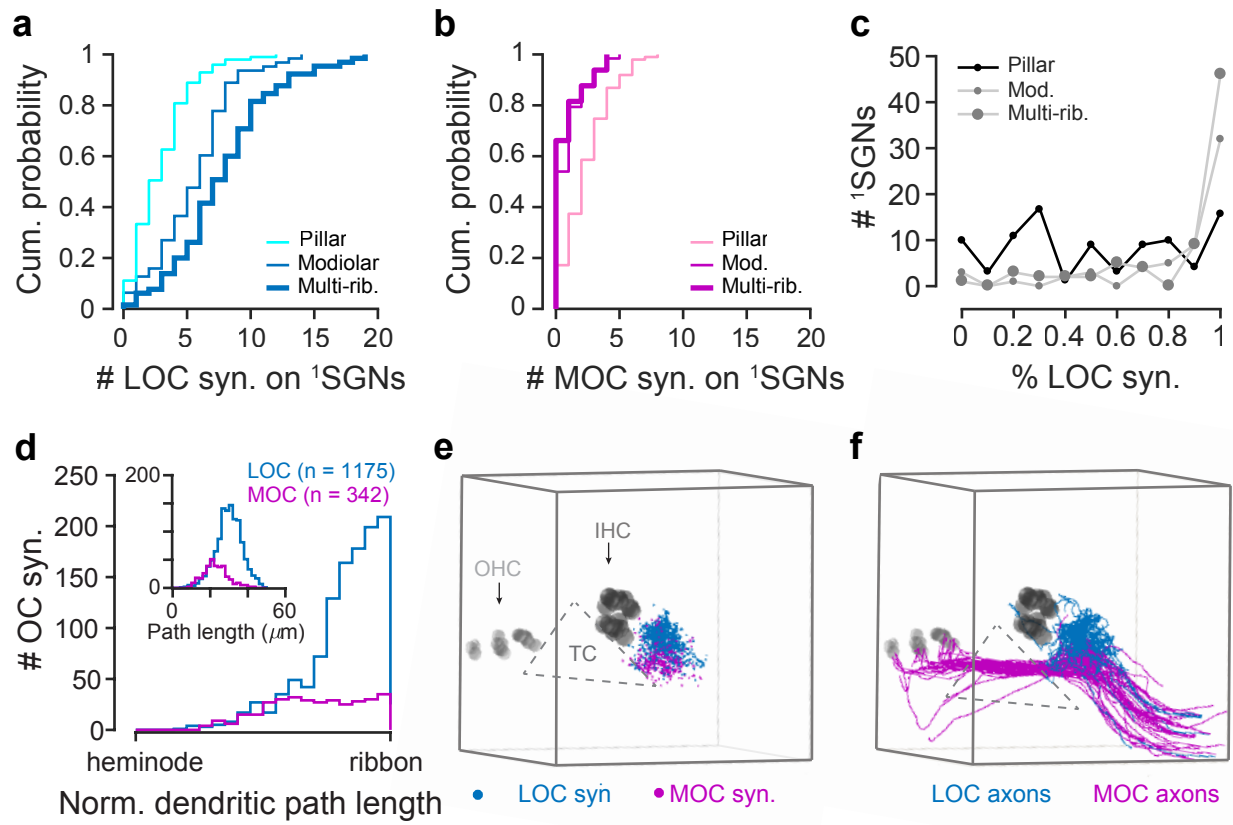

Figure 5
