# Supplementary material for: Electron Microscopic Reconstruction of Neural Circuitry in the Cochlea
Source: bioRxiv or medRxiv preprint supplement (doi:10.1101/2020.01.04.894816), 2020-05-05

**a**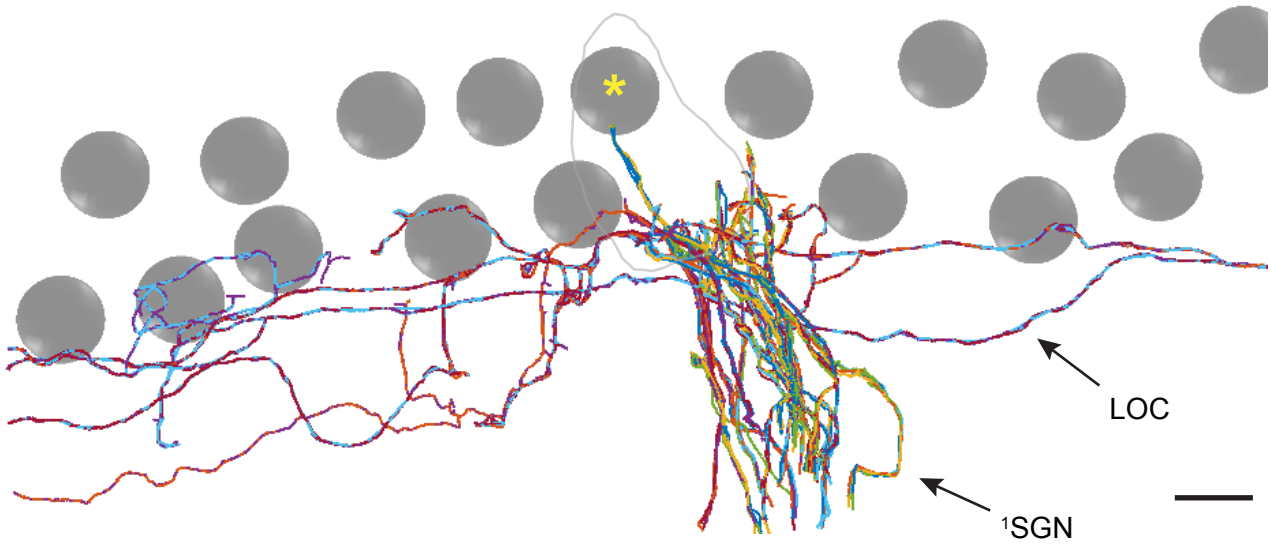**b**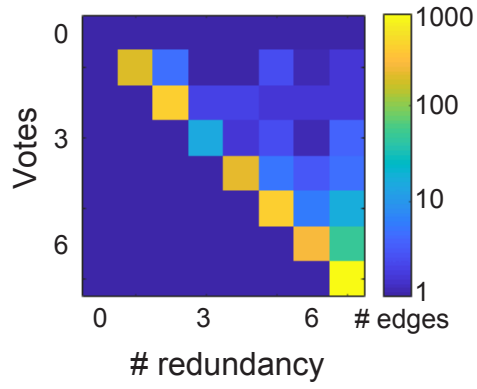**c**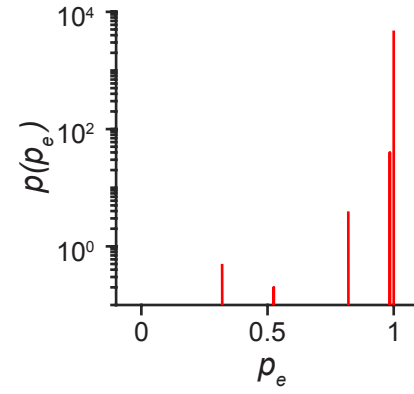**d**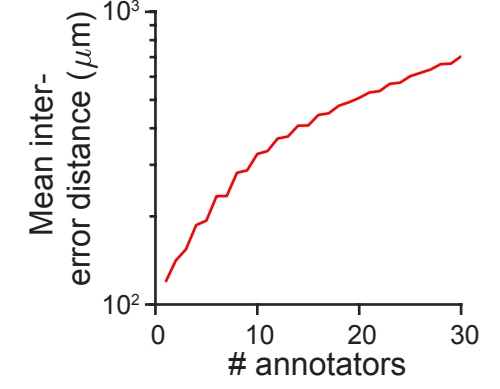

<sup>1</sup>SGN-ID:

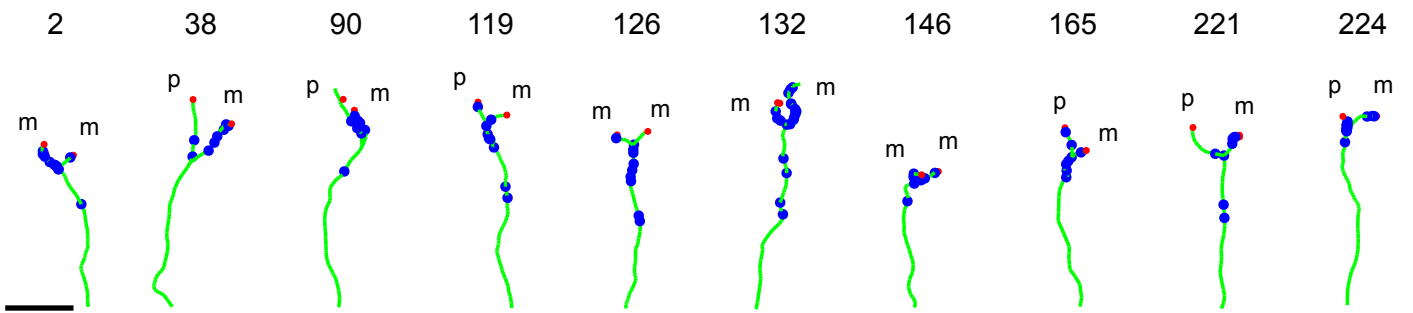

Suppl. 2

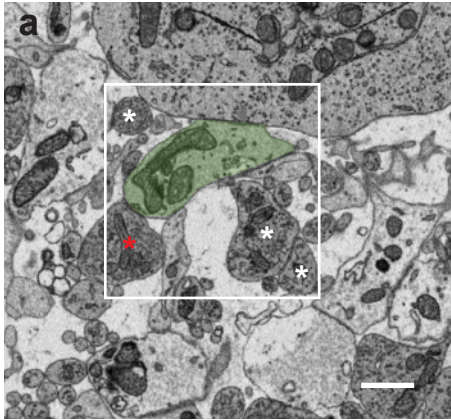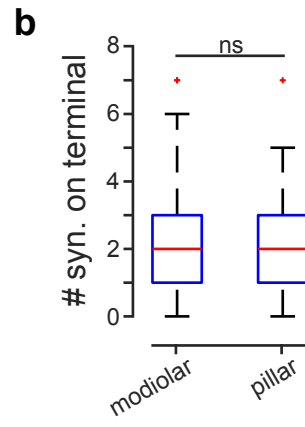

Suppl. 3

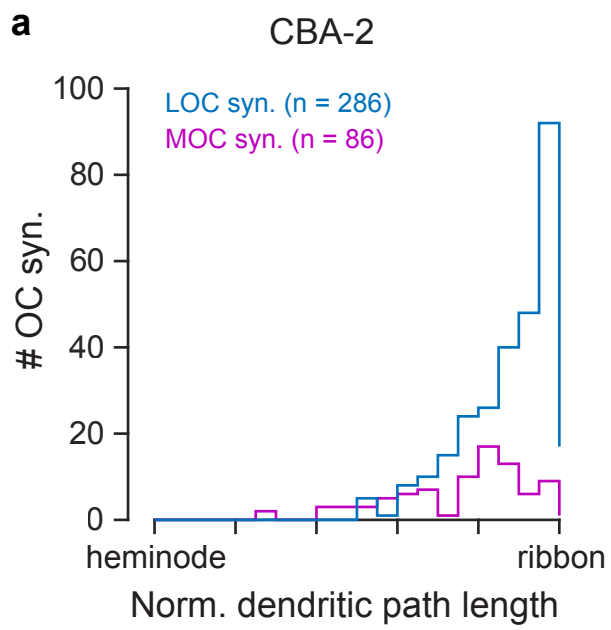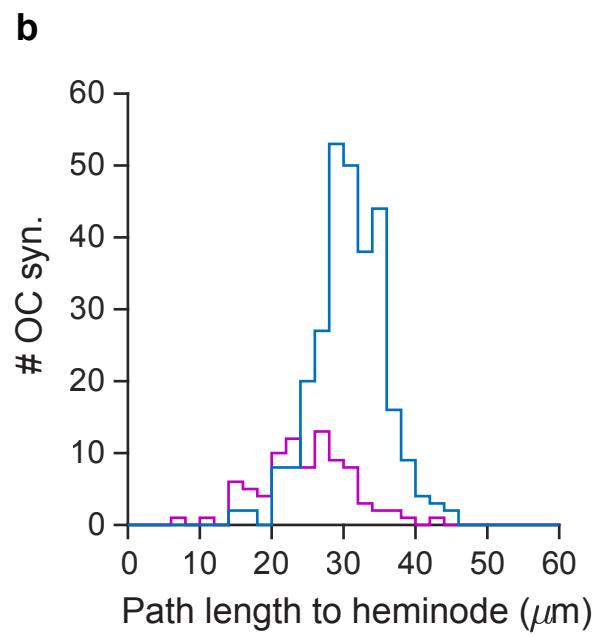

Supplement: Supplementary file [file media-1.pdf]
